# Supplementary material for: Energy generation drives gut colonization by Bilophila wadsworthia
Source: Research Square preprint supplement (doi:10.21203/rs.3.rs-4502164/v1), 2024-07-16
Supplement: Supplementary file 1 [file 24b8a571ed6b5559ebcb6c59.xlsx]

## Sheet: SupplementaryTable1
Supplementary table 1. Non-essential genes in vivo showing a significant logFC compared to in vitro conditions. Negative values represent genes that had lower mutation frequencies in the in vivo conditions and are therefore important for colonization. For transcriptomes, positive logFC indicates higher expression in vivo compared to in vitro. Genes were classified using BV-BRC.
	Small intestine (SI)		Colon		Stool		Transcriptome
Feature	Bw	SIHUMI+Bw	Bw	SIHUMI+Bw	Bw	SIHUMI+Bw	RNA: Culture vs Bw	RNA: Culture vs SIHUMI+Bw	Superclass	Class	Class_curated	Subclass	Subsystem Name	Product PATRIC	Comment
QI0013_Pat_3165	-16.4293	-16.3244	-16.478	-17.579	-17.3596	-19.0606	1.06383	1.53019						Fructose-1,6-bisphosphatase, type I (EC 3.1.3.11)
QI0013_Pat_1529	-16.3277	-16.0246	-16.374	-17.4687	-17.2474	-18.9585	1.02728	1.38141						Heterodisulfide reductase subunit A-like protein	QmoABC is involved in electron transfer to the APS reductase and DsrMKJOP is involved in electron transfer to the sulfite reductase
QI0013_Pat_1530	-16.3277	-16.0246	-16.374	-17.4687	-17.2474	-18.9585	1.19038	1.5697						Heterodisulfide reductase subunit D-like protein / Coenzyme F420-reducing hydrogenase beta subunit-like protein
QI0013_Pat_2316	-15.8525	1.42254	-15.9394	-17.0169	-16.86	-12.7487	1.16628	1.46297						hypothetical protein
QI0013_Pat_2317	-15.8525	-15.6462	-15.9394	-17.0169	-16.86	-12.7487	0.168361	0.748486						RNA polymerase-binding transcription factor DksA
QI0013_Pat_1026	-9.49688	-8.9076	-15.9239	-8.37062	-5.96094	-7.768	-2.16767	-3.05715	ENERGY	Respiration	Respiration	Respiration	Electron donating reactions	Succinate dehydrogenase flavoprotein subunit
QI0013_Pat_1027	-9.49688	-8.9076	-15.9239	-8.37062	-5.96094	-7.768	-3.04918	-2.60408						hypothetical protein
QI0013_Pat_1528	-15.8626	-15.6583	-15.9101	-17.0079	-16.7876	-18.4948	0.761598	1.22206						Heterodisulfide reductase subunit B-like protein
QI0013_Pat_949	-15.4873	-4.29096	-15.5911	-16.6692	-7.2728	-18.1507	1.51922	1.71497	METABOLISM	Sulfur Metabolism	CONVERSION OF TAURINE TO ISETHIONATE	Sulfur Metabolism		Taurine--pyruvate aminotransferase (EC 2.6.1.77)	CONVERSION OF TAURINE TO ISETHIONATE
QI0013_Pat_950	-15.4873	-4.29096	-15.5911	-16.6692	-7.2728	-18.1507	1.04401	1.15424	ENERGY	Energy and Precursor Metabolites Generation	CONVERSION OF TAURINE TO ISETHIONATE	Energy and Precursor Metabolites Generation	Central Metabolism	Alanine dehydrogenase (EC 1.4.1.1)	CONVERSION OF TAURINE TO ISETHIONATE
QI0013_Pat_1643	0	1.83888	-15.5694	-6.19791	0	-2.67549	-3.93769	-5.30656	PROTEIN PROCESSING	Protein Fate (folding, modification, targeting, degradation)	Protein Fate (folding, modification, targeting, degradation)	Protein Fate (folding, modification, targeting, degradation)	Protein folding	Chaperone protein DnaK
QI0013_Pat_2043	-15.4116	-9.36971	-15.4988	-16.5759	-8.45683	-7.16942	1.33773	1.71235	METABOLISM	Carbohydrates	MICROCOMPARTMENT	MICROCOMPARTMENT	Sugar alcohols	Ethanolamine utilization polyhedral-body-like protein EutN	MICROCOMPARTMENT
QI0013_Pat_2045	-6.38496	-9.36971	-15.4988	-16.5759	-4.67899	-7.16942	1.93466	2.37297	METABOLISM	Carbohydrates	MICROCOMPARTMENT	MICROCOMPARTMENT	Sugar alcohols	Phosphate acetyltransferase (EC 2.3.1.8)	MICROCOMPARTMENT
QI0013_Pat_2044	-15.4116	-9.36971	-15.4988	-16.5759	-8.45683	-7.16942	1.26753	1.52882			MICROCOMPARTMENT			Ethanolamine utilization polyhedral-body-like protein EutM	MICROCOMPARTMENT
QI0013_Pat_91	0	-6.1973	-15.493	-4.19987	-4.73575	-6.36308	-0.677772	-0.368662						Transcriptional regulator, IclR family
QI0013_Pat_777	-15.4315	0	-15.4707	-4.947	-16.3206	-7.4106	-3.32332	-2.97277	PROTEIN PROCESSING	Protein Fate (folding, modification, targeting, degradation)	Protein Fate (folding, modification, targeting, degradation)	Protein Fate (folding, modification, targeting, degradation)	Selenoproteins	Formate dehydrogenase O alpha subunit (EC 1.2.1.2) @ selenocysteine-containing
QI0013_Pat_1531	-15.259	-3.97518	-15.3092	-8.64743	-7.09091	-6.38408	1.31831	1.75775						heterodisulfide reductase, iron-sulfur binding subunit, putative
QI0013_Pat_1650	-17.3439	-7.02198	-15.2845	-6.52322	-6.06761	-5.78969	-1.23338	-1.66153	STRESS RESPONSE, DEFENSE, VIRULENCE	Stress Response, Defense and Virulence	Stress Response, Defense and Virulence	Stress Response, Defense and Virulence		HflC protein
QI0013_Pat_1649	-17.3439	-7.02198	-15.2845	-6.52322	-6.06761	-5.78969	-1.00796	-1.35656	STRESS RESPONSE, DEFENSE, VIRULENCE	Stress Response, Defense and Virulence	Stress Response, Defense and Virulence	Stress Response, Defense and Virulence		HflK protein
QI0013_Pat_1527	0	-14.695	-15.2047	-16.295	-8.25483	-6.28824	0	0						Heterodisulfide reductase subunit C-like protein
QI0013_Pat_613	0	-15.003	-14.9948	-16.1013	-15.8841	-9.36191	1.13456	1.13293						restriction modification system DNA specificity domain
QI0013_Pat_778	0	-16.931	-12.1711	-4.947	-16.3206	-7.4106	0	0	ENERGY	Respiration	Respiration	Respiration	Electron donating reactions	Formate dehydrogenase O alpha subunit (EC 1.2.1.2) @ selenocysteine-containing
QI0013_Pat_4170	0	-4.1804	-9.40759	-7.77066	0	-6.29901	0.689775	-0.283608						Rubredoxin
QI0013_Pat_4171	-9.27884	-6.5023	-9.40759	-7.77066	-8.82491	-6.29901	0.686788	-0.40293						rubredoxin-oxygen oxidoreductase
QI0013_Pat_2050	0	-14.5427	-9.39888	-5.88711	-7.57436	-6.29925	1.33007	2.23879			MICROCOMPARTMENT			Cob(III)alamin reductase @ Cob(II)alamin reductase	MICROCOMPARTMENT
QI0013_Pat_2370	-15.4134	-4.30022	-7.96492	-16.5666	-6.71735	-7.57541	-0.788335	-0.313566	METABOLISM	Nucleosides and Nucleotides	Nucleosides and Nucleotides	Nucleosides and Nucleotides	Purines	Phosphoribosylaminoimidazolecarboxamide formyltransferase (EC 2.1.2.3)
QI0013_Pat_2556	-17.1901	-17.1403	-7.92241	-18.3618	-6.26293	-19.8488	1.50717	1.45641						SNF2/helicase domain protein
QI0013_Pat_1931	-15.101	-14.857	-7.65048	-16.2449	-6.94488	-9.54275	-3.73779	-3.24044	STRESS RESPONSE, DEFENSE, VIRULENCE	Stress Response, Defense and Virulence	Stress Response, Defense and Virulence	Stress Response, Defense and Virulence	Resistance to antibiotics and toxic compounds	Apolipoprotein N-acyltransferase / Copper homeostasis protein CutE
QI0013_Pat_2047	-5.55928	-5.86076	-7.54506	-4.89706	-4.65529	-4.96948	1.55377	2.15599			MICROCOMPARTMENT			EutQ-like protein clustered with choline trimethylamine-lyase (putative acetate kinase)	MICROCOMPARTMENT
QI0013_Pat_1625	0	-4.90068	-7.44985	-6.82954	-5.91687	-6.6267	1.01697	1.16299						Dihydroorotate dehydrogenase (NAD(+)), catalytic subunit (EC 1.3.1.14)
QI0013_Pat_2042	-15.7304	-15.3669	-7.30951	-4.92241	-5.64856	-5.15361	1.09468	1.60066	ENERGY	Energy and Precursor Metabolites Generation	MICROCOMPARTMENT	MICROCOMPARTMENT	Central Metabolism	Acetaldehyde dehydrogenase (EC 1.2.1.10) @ Acetaldehyde dehydrogenase (EC 1.2.1.10), clustered with choline trimethylamine-lyase	MICROCOMPARTMENT
QI0013_Pat_2130	-16.6419	-6.51243	-7.0158	-7.67788	-5.25105	-6.07664	0	0	PROTEIN PROCESSING	Protein Synthesis	Protein Synthesis	Protein Synthesis	Translation	Elongation factor G-like protein TM_1651
QI0013_Pat_2346	-16.3028	-10.3752	-6.72182	-17.4498	-5.12921	-8.33706	1.27576	1.87537						RNA-binding protein
QI0013_Pat_2347	0	-10.3752	-6.72182	-17.4498	-5.12921	-8.33706	0	0						hypothetical protein
QI0013_Pat_2051	0	-15.7427	-6.59021	-7.52854	-6.41976	-5.55172	0.591226	1.56403			MICROCOMPARTMENT			Amidohydrolase clustered with pyruvate formate-lyase	MICROCOMPARTMENT
QI0013_Pat_4173	0	-3.31437	-6.5072	-8.70001	-3.60395	-5.07744	2.88291	1.96686	ENERGY	Respiration	Respiration	Respiration	Biogenesis of respiratory chain components	Cytochrome d ubiquinol oxidase subunit II (EC 1.10.3.-)
QI0013_Pat_2049	0	-14.5427	-6.19836	-4.87024	-4.77569	-4.35324	2.05289	2.74656			MICROCOMPARTMENT			PduT-like protein clustered with choline trimethylamine-lyase	MICROCOMPARTMENT
QI0013_Pat_2048	0	-14.5427	-6.19836	-2.48983	-4.77569	-2.13077	1.35971	1.94535			MICROCOMPARTMENT			PduJ-like protein clustered with choline trimethylamine-lyase	MICROCOMPARTMENT
QI0013_Pat_2912	-9.63082	-6.42615	-5.85618	-5.5976	-6.75966	-5.93161	1.12041	1.3344						phosphoenolpyruvate synthase, putative
QI0013_Pat_2297	-15.3334	-4.44321	-5.82943	-4.61706	-5.59645	-4.36593	-1.87764	-1.86954						CBS domain protein
QI0013_Pat_1930	0	-5.30264	-5.55664	-1.59011	-3.59185	-1	0	0	ENERGY	Respiration	Respiration	Respiration	Electron donating reactions	Energy-conserving hydrogenase (ferredoxin), subunit A
QI0013_Pat_1929	0	-5.30264	-5.55664	-1.59011	-3.59185	-1	0	0	ENERGY	Respiration	Respiration	Respiration	Electron donating reactions	Energy-conserving hydrogenase (ferredoxin), subunit B
QI0013_Pat_2279	-6.41965	-5.27817	-5.47377	-7.92984	-4.69909	-8.2529	2.02293	1.85243						Putative inner membrane protein
QI0013_Pat_2278	-6.41965	-5.27817	-5.47377	-7.92984	-4.69909	-8.2529	3.49944	3.55503						hypothetical protein
QI0013_Pat_1127	0	-3.9689	-5.44511	-5.27977	-4.29859	-4.7808	0.799087	1.26833	RNA PROCESSING	RNA Processing	RNA Processing	RNA Processing	RNA processing and modification	tRNA pseudouridine(55) synthase (EC 5.4.99.25)
QI0013_Pat_2195	0	-2.60914	-5.2772	-6.36013	-4.16846	-5.08062	-3.28165	-3.95389						hypothetical protein
QI0013_Pat_2011	0	-4.54945	-5.18724	-3.93934	-3.77405	-3.88237	2.57701	2.91792	PROTEIN PROCESSING	Protein Synthesis	Protein Synthesis	Protein Synthesis	Ribosome biogenesis	LSU ribosomal protein L25p
QI0013_Pat_4172	0	-2.94465	-5.15015	-4.5952	-4.04694	-5.90141	2.33726	1.41401	ENERGY	Respiration	Respiration	Respiration	Biogenesis of respiratory chain components	Cytochrome d ubiquinol oxidase subunit I (EC 1.10.3.-)
QI0013_Pat_3628	0	-3.78806	-5.05207	-5.23948	-3.36228	-4.72038	0.883273	1.07688						hypothetical protein
QI0013_Pat_3627	0	-3.78806	-5.05207	-3.06012	2.73079	-2.30974	1.48585	1.88272						FIG137478: Hypothetical protein
QI0013_Pat_1562	-15.806	-15.4395	-5.0334	-6.08531	-4.90452	-7.03499	1.76288	1.94045	CELLULAR PROCESSES	Clustering-based subsystems	Clustering-based subsystems	Clustering-based subsystems	Cell Division	Signal peptidase I (EC 3.4.21.89)
QI0013_Pat_1564	-15.806	-15.4395	-5.0334	-6.08531	-4.90452	-7.03499	0	0	METABOLISM	Nucleosides and Nucleotides	Nucleosides and Nucleotides	Nucleosides and Nucleotides	Purines	N5-carboxyaminoimidazole ribonucleotide mutase (EC 5.4.99.18)
QI0013_Pat_1563	-15.806	-15.4395	-5.0334	-6.08531	-4.90452	-7.03499	1.82562	1.73694						hypothetical protein
QI0013_Pat_2105	0	-1.54279	-4.98975	-4.19664	-3.47629	-5.05425	1.42139	1.62813						hypothetical protein
QI0013_Pat_2106	0	-1.54279	-4.98975	-4.19664	-3.47629	-5.05425	1.4843	1.85142						RNA-binding protein Jag
QI0013_Pat_871	0	-3.458	-4.92515	-3.54454	-4.29698	-3.73237	0	0	METABOLISM	Amino Acids and Derivatives	Amino Acids and Derivatives	Amino Acids and Derivatives	Alanine, serine, and glycine	Aminomethyltransferase (glycine cleavage system T protein) (EC 2.1.2.10)
QI0013_Pat_1855	0	-3.84793	-4.50999	-16.9441	-5.0434	-8.75871	-0.764993	-0.899454						hypothetical protein
QI0013_Pat_1856	0	0	-4.50999	0	0	0	0	0						hypothetical protein
QI0013_Pat_2046	-6.38496	-5.86076	-4.49052	-4.89706	-4.67899	-5.56937	1.35629	1.8099	METABOLISM	Carbohydrates	MICROCOMPARTMENT	MICROCOMPARTMENT	Sugar alcohols	ATP:Cob(I)alamin adenosyltransferase (EC 2.5.1.17) @ ATP:Cob(I)alamin adenosyltransferase (EC 2.5.1.17), ethanolamine utilization	MICROCOMPARTMENT
QI0013_Pat_2126	0	-3.20127	-4.38519	-1.61192	-3.6923	-1.81372	3.02357	3.64945						hypothetical protein
QI0013_Pat_2127	0	-3.20127	-4.38519	-1.61192	-3.6923	-1.81372	1.71824	2.30971						Transcription termination protein NusA
QI0013_Pat_3720	0	-3.3214	-4.36618	-6.75953	0	-5.51886	1.01833	1.29799	ENERGY	Respiration	Respiration	Respiration	Biogenesis of respiratory chain components	[NiFe] hydrogenase nickel incorporation-associated protein HypB
QI0013_Pat_868	0	-3.83952	-4.35836	-4.90054	-5.3956	-3.89409	1.26927	1.43328	METABOLISM	Cofactors, Vitamins, Prosthetic Groups	Cofactors, Vitamins, Prosthetic Groups	Cofactors, Vitamins, Prosthetic Groups	Lipoic acid	Glycine dehydrogenase [decarboxylating] (glycine cleavage system P2 protein) (EC 1.4.4.2)
QI0013_Pat_867	0	-3.83952	-4.35836	-4.6608	-5.3956	-3.89409	0.114944	0.86037	METABOLISM	Cofactors, Vitamins, Prosthetic Groups	Cofactors, Vitamins, Prosthetic Groups	Cofactors, Vitamins, Prosthetic Groups	Lipoic acid	Lipoate-protein ligase A
QI0013_Pat_2432	-16.1545	-4.22586	-4.29368	-4.50255	-3.71344	-4.30023	1.73729	1.92684						Protein translocase subunit SecD
QI0013_Pat_1893	0	-4.14107	-4.28464	-4.81847	-3.52854	-4.29929	-1.6216	-1.13724	PROTEIN PROCESSING	Protein Fate (folding, modification, targeting, degradation)	Protein Fate (folding, modification, targeting, degradation)	Protein Fate (folding, modification, targeting, degradation)	Protein folding	Chaperone protein DnaJ
QI0013_Pat_1762	0	-15.4075	-4.25075	-3.25976	-4.0558	-3.04999	0.784476	0.868482						hypothetical protein
QI0013_Pat_3567	-6.92433	-2.20564	-4.10321	-7.53176	-4.01079	-6.83144	0.537071	1.19432	METABOLISM	Nucleosides and Nucleotides	Nucleosides and Nucleotides	Nucleosides and Nucleotides	Purines	Phosphoribosylformylglycinamidine cyclo-ligase (EC 6.3.3.1)
QI0013_Pat_3566	-6.92433	-2.20564	-4.10321	-7.53176	-4.01079	-6.83144	1.57045	1.74635						hypothetical protein
QI0013_Pat_869	0	-2.47601	-4.01455	-4.90054	-4.14947	-3.80731	1.34652	1.18145	METABOLISM	Cofactors, Vitamins, Prosthetic Groups	Cofactors, Vitamins, Prosthetic Groups	Cofactors, Vitamins, Prosthetic Groups	Lipoic acid	Glycine dehydrogenase [decarboxylating] (glycine cleavage system P1 protein) (EC 1.4.4.2)
QI0013_Pat_1602	0	-1.97463	-4.00664	-4.09083	0	-5.36516	-1.80339	-1.34576						TPR domain protein
QI0013_Pat_849	0	-4.61348	-3.85692	-3.01601	0	-2.67938	1.03891	1.66054	ENERGY	Respiration	Respiration	Respiration		High-molecular-weight cytochrome c
QI0013_Pat_848	0	-4.61348	-3.85692	-3.01601	-2.33358	-2.67938	1.54208	2.06233	ENERGY	Respiration	Respiration	Respiration		Four [4Fe-4S] cluster protein DVU_0535
QI0013_Pat_1604	0	-3.701	-3.73047	-4.0887	-3.6599	-4.45003	-3.23595	-2.59572						FIG00604116: hypothetical protein
QI0013_Pat_1603	0	-3.701	-3.73047	-4.0887	-3.6599	-4.45003	-2.23457	-1.68682						FIG00602249: hypothetical protein
QI0013_Pat_4263	0	-5.17714	-3.69925	-10.5236	0	-7.78921	1.10636	1.68163	METABOLISM	Nucleosides and Nucleotides	Nucleosides and Nucleotides	Nucleosides and Nucleotides	Purines	Phosphoribosylformylglycinamidine synthase, PurS subunit (EC 6.3.5.3) / Phosphoribosylformylglycinamidine synthase, synthetase subunit (EC 6.3.5.3)
QI0013_Pat_1873	0	-7.02533	-3.69224	-5.6963	-4.18607	-6.34897	0.900966	1.4259	STRESS RESPONSE, DEFENSE, VIRULENCE	Stress Response, Defense and Virulence	Stress Response, Defense and Virulence	Stress Response, Defense and Virulence		SSU ribosomal protein S1p
QI0013_Pat_1871	0	-7.02533	-3.69224	-5.6963	-4.18607	-6.34897	1.0993	1.16139						uncharacterized protein with VanW-like domain
QI0013_Pat_1872	0	-7.02533	-3.69224	-5.6963	-4.18607	-6.34897	0	0						hypothetical protein
QI0013_Pat_844	0	-3.34971	-3.62449	-3.12338	-3.03953	-2.8067	0.969075	1.21929	ENERGY	Respiration	Respiration	Respiration		Two [4Fe-4S] cluster protein DVU_0531
QI0013_Pat_843	0	-3.34971	-3.62449	-3.12338	-3.03953	-2.8067	0	0						hypothetical protein
QI0013_Pat_3318	0	-2.13595	-3.52982	-6.07043	0	-4.23218	1.4991	1.88584	DNA PROCESSING	DNA Processing	DNA Processing	DNA Processing	DNA repair	DNA mismatch repair protein MutS
QI0013_Pat_3319	0	-2.13595	-3.52982	-6.07043	0	-4.23218	1.27463	1.33392						hypothetical protein
QI0013_Pat_4019	0	-1	-3.4713	-4.71215	0	-2.80052	-0.983274	-0.162468						Transcriptional regulator, GntR family
QI0013_Pat_4018	0	0	-3.4713	-4.71215	0	-2.80052	0	0						hypothetical protein
QI0013_Pat_2036	0	-2.36568	-3.43358	-2.36152	0	-2.14724	0	0						Predicted L-lactate dehydrogenase, Fe-S oxidoreductase subunit YkgE / Predicted L-lactate dehydrogenase, Iron-sulfur cluster-binding subunit YkgF
QI0013_Pat_2491	0	0	-3.33333	-1.50783	-3.17632	-1.46558	-2.51577	-2.73378	PROTEIN PROCESSING	Protein Fate (folding, modification, targeting, degradation)	Protein Fate (folding, modification, targeting, degradation)	Protein Fate (folding, modification, targeting, degradation)	Protein degradation	ATP-dependent protease La (EC 3.4.21.53) Type I
QI0013_Pat_1216	0	-3.52595	-3.30587	-6.0548	0	-5.01669	0	0						hypothetical protein
QI0013_Pat_1217	0	-3.52595	-3.30587	-6.0548	0	-5.01669	0.598136	0.797324						hypothetical protein
QI0013_Pat_2472	0	-2.47366	-3.3025	0	0	0	-0.552499	-1.64855						Aspartate ammonia-lyase (EC 4.3.1.1)
QI0013_Pat_1709	0	1.07411	-3.29212	-2.92129	-4.28824	-2.03421	1.39098	1.22816						Aminotransferase, DegT/DnrJ/EryC1/StrS family
QI0013_Pat_1710	0	-14.7665	-3.29212	-2.92129	-4.28824	-2.03421	0	0						alcohol dehydrogenase, iron-containing
QI0013_Pat_168	0	0	-3.17299	-8.76185	0	-5.20767	2.60932	2.77509						Capsular polysaccharide export system periplasmic protein KpsD
QI0013_Pat_1189	0	-2.95324	-3.13893	-5.75382	-2.75328	-6.10846	0	0	METABOLISM	Amino Acids and Derivatives	Amino Acids and Derivatives	Amino Acids and Derivatives	Arginine; urea cycle, creatine, polyamines	Ornithine carbamoyltransferase (EC 2.1.3.3)
QI0013_Pat_1188	0	-2.95324	-3.13893	-5.75382	-2.75328	-6.10846	0	0						hypothetical protein
QI0013_Pat_3629	0	-3.52723	-3.04362	-6.09866	-2.94792	-6.6045	0.786718	0.882698	METABOLISM	Nucleosides and Nucleotides	Nucleosides and Nucleotides	Nucleosides and Nucleotides	Purines	Phosphoribosylformylglycinamidine synthase, glutamine amidotransferase subunit (EC 6.3.5.3)
QI0013_Pat_1440	0	-6.22861	-3.01777	-10.5156	-3.16652	-8.15068	0	0	METABOLISM	Carbohydrates	Carbohydrates	Carbohydrates	C-1 compound metabolism	Adenosylhomocysteinase (EC 3.3.1.1)
QI0013_Pat_1441	0	-6.22861	-3.01777	-10.5156	-2.55937	-8.15068	0	0						Predicted regulator of methionine metabolism, ArsR family
QI0013_Pat_1834	0	-5.49047	-3.0098	-3.96502	-3.02351	-3.50896	1.63462	1.49796						hypothetical protein
QI0013_Pat_1731	0	-1.36178	-3	-4.26044	-3.69459	-3.06616	1.4736	1.57548	METABOLISM	Carbohydrates	Carbohydrates	Carbohydrates	Monosaccharides	GDP-mannose 4,6-dehydratase (EC 4.2.1.47)
QI0013_Pat_1349	0	-2.61083	-2.91259	-3.50818	-2	-3.20172	0	0	STRESS RESPONSE, DEFENSE, VIRULENCE	Stress Response, Defense and Virulence	Stress Response, Defense and Virulence	Stress Response, Defense and Virulence	Stress Response	Universal stress protein family
QI0013_Pat_847	0	-4.61348	-2.78894	-3.01601	-3.01752	-2.67938	2.21183	2.67589	ENERGY	Respiration	Respiration	Respiration		Integral membrane protein DVU_0534
QI0013_Pat_846	0	-4.61348	-2.78894	-3.01601	0	-2.67938	3.24524	3.66511	ENERGY	Respiration	Respiration	Respiration		Integral membrane protein DVU_0533
QI0013_Pat_845	0	-4.61348	-2.78894	-1.85373	-2.63021	-2.29584	2.47385	2.80047	ENERGY	Respiration	Respiration	Respiration		Integral membrane protein DVU_0532
QI0013_Pat_1927	0	0	-2.75191	-1.51869	-2.45714	0	0	0	ENERGY	Respiration	Respiration	Respiration	Electron donating reactions	Energy-conserving hydrogenase (ferredoxin), subunit D
QI0013_Pat_1928	0	-1.0165	-2.75191	-1.51869	-2.45714	0	0	0	ENERGY	Respiration	Respiration	Respiration	Electron donating reactions	Energy-conserving hydrogenase (ferredoxin), subunit C
QI0013_Pat_2431	0	-4.22586	-2	-7.48925	0	-8.89154	0.847911	1.01736						Protein translocase subunit YajC
QI0013_Pat_4129	0	1.94224	0	-2.57313	0	-2.07635	2.17416	2.81751						Branched-chain amino acid ABC transporter, ATP-binding protein LivF (TC 3.A.1.4.1)	Leucine; leucine/isoleucine/valine porter (also transports phenylalanine and tyrosine; Koyanagi et al., 2004)
QI0013_Pat_4128	0	1.94224	0	-2.57313	0	-2.07635	1.31609	2.01978						Branched-chain amino acid ABC transporter, ATP-binding protein LivG (TC 3.A.1.4.1)	Leucine; leucine/isoleucine/valine porter (also transports phenylalanine and tyrosine; Koyanagi et al., 2004)
QI0013_Pat_3992	0	-1.32043	0	-2.2931	0	0	0	0						Branched-chain amino acid ABC transporter, permease protein LivH (TC 3.A.1.4.1)	Leucine; leucine/isoleucine/valine porter (also transports phenylalanine and tyrosine; Koyanagi et al., 2004)
QI0013_Pat_3993	0	0	0	-2.2931	0	0	0	0						Branched-chain amino acid ABC transporter, permease protein LivM (TC 3.A.1.4.1)	Leucine; leucine/isoleucine/valine porter (also transports phenylalanine and tyrosine; Koyanagi et al., 2004)
QI0013_Pat_4126	0	-1.32043	0	-2.2931	0	0	0	0						Branched-chain amino acid ABC transporter, permease protein LivH (TC 3.A.1.4.1)	Leucine; leucine/isoleucine/valine porter (also transports phenylalanine and tyrosine; Koyanagi et al., 2004)
QI0013_Pat_4127	0	0	0	-2.2931	0	0	0	0						Branched-chain amino acid ABC transporter, permease protein LivM (TC 3.A.1.4.1)	Leucine; leucine/isoleucine/valine porter (also transports phenylalanine and tyrosine; Koyanagi et al., 2004)
QI0013_Pat_165	0	0	0	-5.87631	0	-6.4008	1.56621	1.61389						Capsular polysaccharide ABC transporter, permease protein KpsM	Major virulence determinant
QI0013_Pat_166	0	0	0	-5.24097	0	0	2.47251	2.55688						Capsular polysaccharide ABC transporter, ATP-binding protein KpsT	Major virulence determinant
QI0013_Pat_167	0	0	0	-5.24097	0	0	2.2012	2.25809						Capsular polysaccharide export system inner membrane protein KpsE	Major virulence determinant
QI0013_Pat_2040	0	0	0	0	0	-2.89807	0	0	ENERGY	Energy and Precursor Metabolites Generation	MICROCOMPARTMENT	MICROCOMPARTMENT	Fermentation	Pyruvate formate-lyase (EC 2.3.1.54)	MICROCOMPARTMENT
QI0013_Pat_2063	0	-1.60499	0	-2.28955	0	-1	0	0			Phage			Integration host factor alpha subunit	Phage
QI0013_Pat_1837	0	0	0	-5.95537	0	0	0	0	METABOLISM	Sulfur Metabolism	Sulfur Metabolism	Sulfur Metabolism		Sulfur redox associated protein DsrC
QI0013_Pat_2592	0	-1.84865	0	-2.66482	0	0	1.23768	1.46312	CELLULAR PROCESSES	Cell Cycle, Cell Division and Death	Cell Cycle, Cell Division and Death	Cell Cycle, Cell Division and Death		16S rRNA (cytosine(1402)-N(4))-methyltransferase (EC 2.1.1.199)
QI0013_Pat_2605	0	-1.90124	0	-2.01216	0	-1.80151	0	0	CELLULAR PROCESSES	Cell Cycle, Cell Division and Death	Cell Cycle, Cell Division and Death	Cell Cycle, Cell Division and Death		Cell division protein FtsA
QI0013_Pat_3297	0	0	0	-1.68231	0	-1.66449	1.60327	1.92345	PROTEIN PROCESSING	Protein Synthesis	Protein Synthesis	Protein Synthesis		GTP-binding protein TypA/BipA
QI0013_Pat_2591	0	-1.84865	0	-1.40417	0	0	-2.35078	-2.19544	CELLULAR PROCESSES	Cell Cycle, Cell Division and Death	Cell Cycle, Cell Division and Death	Cell Cycle, Cell Division and Death		Transcriptional regulator MraZ
QI0013_Pat_143	0	6.38242	0	0	0	0	-4.2273	-4.71837	METABOLISM	Metabolite damage and its repair or mitigation	Metabolite damage and its repair or mitigation	Metabolite damage and its repair or mitigation		Alkyl hydroperoxide reductase protein F
QI0013_Pat_2520	0	1.92933	0	0	0	0	-0.0519637	-1.62349	METABOLISM	Phosphate Metabolism	Phosphate Metabolism	Phosphate Metabolism		Phosphate ABC transporter, substrate-binding protein PstS (TC 3.A.1.7.1)
QI0013_Pat_127	0	5.43265	0	0	0	0	1.86079	1.94804	REGULATION AND CELL SIGNALING	Regulation and Cell signaling	Regulation and Cell signaling	Regulation and Cell signaling		Diguanylate cyclase
QI0013_Pat_1996	0	1.41763	0	0	0	0	1.33689	1.33565	METABOLISM	Amino Acids and Derivatives	Amino Acids and Derivatives	Amino Acids and Derivatives		Aspartate racemase (EC 5.1.1.13)
QI0013_Pat_1164	0	1.82457	0	0	0	0	0	0	PROTEIN PROCESSING	Protein Synthesis	Protein Synthesis	Protein Synthesis		GTP-binding protein Obg
QI0013_Pat_1905	0	1.6176	0	0	0	0	0	0	PROTEIN PROCESSING	Protein Synthesis	Protein Synthesis	Protein Synthesis		GTP-binding protein Era
QI0013_Pat_2078	0	1.35749	0	0	0	0	-0.764564	-0.495417	METABOLISM	Amino Acids and Derivatives	Amino Acids and Derivatives	Amino Acids and Derivatives		Aspartate racemase (EC 5.1.1.13)
QI0013_Pat_2138	0	-1.18599	0	0	0	0	-1.12083	-0.866712	CELLULAR PROCESSES	Cell Cycle, Cell Division and Death	Cell Cycle, Cell Division and Death	Cell Cycle, Cell Division and Death		DNA primase DnaG
QI0013_Pat_2354	0	6.6303	0	0	0	0	0	0	CELLULAR PROCESSES	Cell Cycle, Cell Division and Death	Cell Cycle, Cell Division and Death	Cell Cycle, Cell Division and Death		Diadenylate cyclase spyDAC; Bacterial checkpoint controller DisA with nucleotide-binding domain
QI0013_Pat_2355	0	6.6303	0	0	0	0	0	0	CELLULAR PROCESSES	Cell Cycle, Cell Division and Death	Cell Cycle, Cell Division and Death	Cell Cycle, Cell Division and Death		Uncharacterized secreted protein associated with spyDAC
QI0013_Pat_4176	0	1.05559	0	0	0	0	0	0	CELLULAR PROCESSES	Cell Cycle, Cell Division and Death	Cell Cycle, Cell Division and Death	Cell Cycle, Cell Division and Death		Histidinol dehydrogenase (EC 1.1.1.23)
QI0013_Pat_3551	0	-1.37283	0	-3.25009	0	-2.01794	1.03065	1.3822	PROTEIN PROCESSING	Protein Synthesis	Protein Synthesis	Protein Synthesis	Aminoacyl-tRNA-synthetases	Glycyl-tRNA synthetase alpha chain (EC 6.1.1.14)
QI0013_Pat_2304	0	-1.32055	0	0	0	0	1.27783	1.44849	PROTEIN PROCESSING	Protein Synthesis	Protein Synthesis	Protein Synthesis	Aminoacyl-tRNA-synthetases	Methionyl-tRNA synthetase (EC 6.1.1.10)
QI0013_Pat_829	0	2.08952	0	0	0	0	0.00334973	0.604713	PROTEIN PROCESSING	Protein Synthesis	Protein Synthesis	Protein Synthesis	Aminoacyl-tRNA-synthetases	Lysyl-tRNA synthetase (class II) (EC 6.1.1.6)
QI0013_Pat_4383	0	-1.33817	0	-3.8253	0	-3.35108	0.565803	1.01193	METABOLISM	Amino Acids and Derivatives	Amino Acids and Derivatives	Amino Acids and Derivatives	Arginine; urea cycle, creatine, polyamines	Argininosuccinate synthase (EC 6.3.4.5)
QI0013_Pat_4384	0	-1.06567	0	-3.32489	0	-2.14373	0.777529	1.17591	METABOLISM	Amino Acids and Derivatives	Amino Acids and Derivatives	Amino Acids and Derivatives	Arginine; urea cycle, creatine, polyamines	Argininosuccinate lyase (EC 4.3.2.1)
QI0013_Pat_1700	0	0	0	-1.87948	0	-1.40021	2.23807	2.66863	METABOLISM	Amino Acids and Derivatives	Amino Acids and Derivatives	Amino Acids and Derivatives	Arginine; urea cycle, creatine, polyamines	Carboxynorspermidine synthase (EC 1.5.1.43)
QI0013_Pat_1430	0	1.57744	0	0	0	0	-2.15706	-1.16097	METABOLISM	Amino Acids and Derivatives	Amino Acids and Derivatives	Amino Acids and Derivatives	Arginine; urea cycle, creatine, polyamines	Spermidine/putrescine import ABC transporter ATP-binding protein PotA (TC 3.A.1.11.1)
QI0013_Pat_1425	0	1.52845	0	0	0	0	-1.9813	-1.59176	METABOLISM	Amino Acids and Derivatives	Amino Acids and Derivatives	Amino Acids and Derivatives	Arginine; urea cycle, creatine, polyamines	Spermidine/putrescine import ABC transporter substrate-binding protein PotD (TC 3.A.1.11.1)
QI0013_Pat_2283	0	1.85833	0	0	0	0	-1.81636	-1.4988	METABOLISM	Amino Acids and Derivatives	Amino Acids and Derivatives	Amino Acids and Derivatives	Arginine; urea cycle, creatine, polyamines	N-acetyl-gamma-glutamyl-phosphate reductase (EC 1.2.1.38)
QI0013_Pat_1699	0	1.89367	0	0	0	0	1.10993	1.66924	METABOLISM	Amino Acids and Derivatives	Amino Acids and Derivatives	Amino Acids and Derivatives	Arginine; urea cycle, creatine, polyamines	Biosynthetic arginine decarboxylase (EC 4.1.1.19)
QI0013_Pat_1428	0	2.72973	0	0	0	0	-0.904984	-0.146555	METABOLISM	Amino Acids and Derivatives	Amino Acids and Derivatives	Amino Acids and Derivatives	Arginine; urea cycle, creatine, polyamines	Spermidine/putrescine import ABC transporter permease protein PotC (TC 3.A.1.11.1)
QI0013_Pat_1627	0	1.37169	0	0	0	1.68329	0	0	METABOLISM	Amino Acids and Derivatives	Amino Acids and Derivatives	Amino Acids and Derivatives	Arginine; urea cycle, creatine, polyamines	Glutamate N-acetyltransferase (EC 2.3.1.35) @ N-acetylglutamate synthase (EC 2.3.1.1)
QI0013_Pat_2028	0	1.12115	0	0	0	0	0.448113	0.772914	METABOLISM	Amino Acids and Derivatives	Amino Acids and Derivatives	Amino Acids and Derivatives	Arginine; urea cycle, creatine, polyamines	Spermidine/putrescine import ABC transporter ATP-binding protein PotA (TC 3.A.1.11.1)
QI0013_Pat_4160	0	-1.82334	0	0	0	0	-1.71471	-2.37253	METABOLISM	Amino Acids and Derivatives	Amino Acids and Derivatives	Amino Acids and Derivatives	Aromatic amino acids and derivatives	Anthranilate synthase, aminase component (EC 4.1.3.27)
QI0013_Pat_2551	0	5.36704	0	0	0	0	1.3049	1.50358	METABOLISM	Amino Acids and Derivatives	Amino Acids and Derivatives	Amino Acids and Derivatives	Aromatic amino acids and derivatives	Indolepyruvate oxidoreductase subunit IorA (EC 1.2.7.8)
QI0013_Pat_1865	0	-1.54715	0	0	0	0	-1.0729	-0.735975	METABOLISM	Amino Acids and Derivatives	Amino Acids and Derivatives	Amino Acids and Derivatives	Aromatic amino acids and derivatives	3-phosphoshikimate 1-carboxyvinyltransferase (EC 2.5.1.19)
QI0013_Pat_2511	0	1.78879	0	0	0	0	0.902127	1.32372	METABOLISM	Amino Acids and Derivatives	Amino Acids and Derivatives	Amino Acids and Derivatives	Aromatic amino acids and derivatives	Biosynthetic Aromatic amino acid aminotransferase alpha (EC 2.6.1.57) @ Aspartate aminotransferase (EC 2.6.1.1)
QI0013_Pat_2856	0	3.52495	0	0	0	0	0	0	METABOLISM	Amino Acids and Derivatives	Amino Acids and Derivatives	Amino Acids and Derivatives	Aromatic amino acids and derivatives	Chorismate synthase (EC 4.2.3.5)
QI0013_Pat_1343	0	1.46473	0	1.74239	0	1.74034	0	0	METABOLISM	Amino Acids and Derivatives	Amino Acids and Derivatives	Amino Acids and Derivatives	Aromatic amino acids and derivatives	Chorismate mutase I (EC 5.4.99.5) / Prephenate dehydratase (EC 4.2.1.51)
QI0013_Pat_2092	0	-1.8817	0	0	0	0	0	0	ENERGY	Respiration	Respiration	Respiration	ATP synthases	ATP synthase F0 sector subunit a (EC 3.6.3.14)
QI0013_Pat_1483	0	0	0	-4.1569	0	-4.76097	-0.741088	-0.82942	ENERGY	Respiration	Respiration	Respiration	Biogenesis of respiratory chain components	ATP-dependent Clp protease ATP-binding subunit ClpX
QI0013_Pat_1184	0	3.04068	0	0	0	0	0.777566	1.26802	ENERGY	Respiration	Respiration	Respiration	Biogenesis of respiratory chain components	[NiFe] hydrogenase metallocenter assembly protein HypE
QI0013_Pat_1222	0	-1.53527	0	0	0	0	-3.11801	-3.44511	METABOLISM	Cofactors, Vitamins, Prosthetic Groups	Cofactors, Vitamins, Prosthetic Groups	Cofactors, Vitamins, Prosthetic Groups	Biotin	tRNA (cytidine(34)-2'-O)-methyltransferase (EC 2.1.1.207)
QI0013_Pat_1995	0	1.09741	0	0	0	0	0.764788	0.876707	METABOLISM	Cofactors, Vitamins, Prosthetic Groups	Cofactors, Vitamins, Prosthetic Groups	Cofactors, Vitamins, Prosthetic Groups	Biotin	Long-chain-fatty-acid--CoA ligase (EC 6.2.1.3)
QI0013_Pat_4356	0	1.63222	0	-3.7462	0	-3.42282	1.53443	1.85819	METABOLISM	Amino Acids and Derivatives	Amino Acids and Derivatives	Amino Acids and Derivatives	Branched-chain amino acids	(R)-citramalate synthase (EC 2.3.1.182)
QI0013_Pat_3177	0	1.00727	0	-2.30085	0	-2.70882	1.3795	1.19706	METABOLISM	Amino Acids and Derivatives	Amino Acids and Derivatives	Amino Acids and Derivatives	Branched-chain amino acids	Acetolactate synthase large subunit (EC 2.2.1.6)
QI0013_Pat_2833	0	1.09164	0	0	0	0	1.30072	1.17616	METABOLISM	Amino Acids and Derivatives	Amino Acids and Derivatives	Amino Acids and Derivatives	Branched-chain amino acids	Dihydroxy-acid dehydratase (EC 4.2.1.9)
QI0013_Pat_3179	0	-1.48484	0	0	0	0	0.605285	0.971442	METABOLISM	Amino Acids and Derivatives	Amino Acids and Derivatives	Amino Acids and Derivatives	Branched-chain amino acids	Ketol-acid reductoisomerase (NADP(+)) (EC 1.1.1.86)
QI0013_Pat_1493	0	1.27279	0	1.15432	0	0	1.48256	1.44394	METABOLISM	Amino Acids and Derivatives	Amino Acids and Derivatives	Amino Acids and Derivatives	Branched-chain amino acids	2-isopropylmalate synthase (EC 2.3.3.13)
QI0013_Pat_4373	0	5.63615	0	0	0	0	-1.12713	-0.933832	METABOLISM	Carbohydrates	Carbohydrates	Carbohydrates	C-1 compound metabolism	Methenyltetrahydrofolate cyclohydrolase (EC 3.5.4.9) / Methylenetetrahydrofolate dehydrogenase (NADP+) (EC 1.5.1.5)
QI0013_Pat_1722	0	3.09688	0	0	0	0	0.871615	0.467452	CELL ENVELOPE	Cell Envelope, Capsule and Slime layer	Cell Envelope, Capsule and Slime layer	Cell Envelope, Capsule and Slime layer	Capsule and Slime layer	Glucose-1-phosphate thymidylyltransferase (EC 2.7.7.24)
QI0013_Pat_2097	0	1.53541	0	0	0	0	0	0	CELL ENVELOPE	Cell Envelope, Capsule and Slime layer	Cell Envelope, Capsule and Slime layer	Cell Envelope, Capsule and Slime layer	Capsule and Slime layer	dTDP-4-dehydrorhamnose reductase (EC 1.1.1.133)
QI0013_Pat_1302	0	0	0	-1.57704	0	0	-1.7399	-1.28797	MEMBRANE TRANSPORT	Membrane Transport	Membrane Transport	Membrane Transport	Cation transporters	Magnesium and cobalt efflux protein CorC
QI0013_Pat_1220	0	-14.3406	0	0	-5.58285	0	-3.85199	-4.60399	MEMBRANE TRANSPORT	Membrane Transport	Membrane Transport	Membrane Transport	Cation transporters	Lead, cadmium, zinc and mercury transporting ATPase (EC 3.6.3.3) (EC 3.6.3.5); Copper-translocating P-type ATPase (EC 3.6.3.4)
QI0013_Pat_3982	0	16.8653	0	0	0	0	0	0	MEMBRANE TRANSPORT	Membrane Transport	Membrane Transport	Membrane Transport	Cation transporters	Mg(2+) transport ATPase, P-type (EC 3.6.3.2)
QI0013_Pat_1061	0	0	0	1.82667	0	0	-1.93471	-2.24178	MEMBRANE TRANSPORT	Membrane Transport	Membrane Transport	Membrane Transport	Cation transporters	Potassium-transporting ATPase B chain (EC 3.6.3.12) (TC 3.A.3.7.1)
QI0013_Pat_2694	0	16.0761	0	0	0	0	0	0	CELLULAR PROCESSES	Clustering-based subsystems	Clustering-based subsystems	Clustering-based subsystems	Cell Division	Chromosome (plasmid) partitioning protein ParA
QI0013_Pat_1542	0	2.4877	0	0	0	0	0	0	CELLULAR PROCESSES	Clustering-based subsystems	Clustering-based subsystems	Clustering-based subsystems	Cell Division	Chromosome (plasmid) partitioning protein ParB
QI0013_Pat_3	0	1.05323	0	0	0	0	1.84046	1.97195	CELL ENVELOPE	Cell Envelope, Capsule and Slime layer	Cell Envelope, Capsule and Slime layer	Cell Envelope, Capsule and Slime layer	Cell wall of Mycobacteria	UDP-galactopyranose mutase (EC 5.4.99.9)
QI0013_Pat_3570	0	-2.94658	0	-1.65688	0	-1.75079	1.87788	1.71112	ENERGY	Energy and Precursor Metabolites Generation	Energy and Precursor Metabolites Generation	Energy and Precursor Metabolites Generation	Central Metabolism	Pyruvate-flavodoxin oxidoreductase
QI0013_Pat_1869	0	-1.92423	0	-1.33129	0	-1	0	0	ENERGY	Energy and Precursor Metabolites Generation	Energy and Precursor Metabolites Generation	Energy and Precursor Metabolites Generation	Central Metabolism	Glycolate dehydrogenase (EC 1.1.99.14), subunit GlcD
QI0013_Pat_1976	0	3.23034	0	0	0	0	-3.61324	-3.56702	ENERGY	Energy and Precursor Metabolites Generation	Energy and Precursor Metabolites Generation	Energy and Precursor Metabolites Generation	Central Metabolism	Ribose-5-phosphate isomerase B (EC 5.3.1.6)
QI0013_Pat_2151	0	3.04593	0	0	3.74155	0	-1.77989	-1.72663	ENERGY	Energy and Precursor Metabolites Generation	Energy and Precursor Metabolites Generation	Energy and Precursor Metabolites Generation	Central Metabolism	Pyruvate kinase (EC 2.7.1.40)
QI0013_Pat_3571	0	1.46911	0	0	0	0	1.78398	1.90711	ENERGY	Energy and Precursor Metabolites Generation	Energy and Precursor Metabolites Generation	Energy and Precursor Metabolites Generation	Central Metabolism	BioD-like N-terminal domain / Phosphate acetyltransferase (EC 2.3.1.8)
QI0013_Pat_1807	0	1.25491	0	0	0	0	0.38112	0.733948	ENERGY	Energy and Precursor Metabolites Generation	Energy and Precursor Metabolites Generation	Energy and Precursor Metabolites Generation	Central Metabolism	Branched-chain amino acid aminotransferase (EC 2.6.1.42)
QI0013_Pat_1891	0	0	0	2.77883	0	3.10275	-1.60526	-1.71429	ENERGY	Energy and Precursor Metabolites Generation	Energy and Precursor Metabolites Generation	Energy and Precursor Metabolites Generation	Central Metabolism	L-serine dehydratase, beta subunit (EC 4.3.1.17) / L-serine dehydratase, alpha subunit (EC 4.3.1.17)
QI0013_Pat_1658	0	0	0	1.27955	0	0	1.13621	1.27096	METABOLISM	Carbohydrates	Carbohydrates	Carbohydrates	CO2 fixation	Serine--glyoxylate aminotransferase (EC 2.6.1.45)
QI0013_Pat_2285	0	1.24094	0	1.38942	0	0	0.888293	1.12949	METABOLISM	Carbohydrates	Carbohydrates	Carbohydrates	CO2 fixation	Serine--glyoxylate aminotransferase (EC 2.6.1.45)
QI0013_Pat_1087	0	3.72977	0	1.563	0	1.56906	0	0	METABOLISM	Cofactors, Vitamins, Prosthetic Groups	Cofactors, Vitamins, Prosthetic Groups	Cofactors, Vitamins, Prosthetic Groups	Coenzyme A	Pantoate--beta-alanine ligase (EC 6.3.2.1)
QI0013_Pat_1088	0	3.72977	0	1.563	0	1.56906	0	0	METABOLISM	Cofactors, Vitamins, Prosthetic Groups	Cofactors, Vitamins, Prosthetic Groups	Cofactors, Vitamins, Prosthetic Groups	Coenzyme A	3-methyl-2-oxobutanoate hydroxymethyltransferase (EC 2.1.2.11)
QI0013_Pat_2362	0	-3.13567	0	0	0	0	0.824046	1.57	DNA PROCESSING	DNA Processing	DNA Processing	DNA Processing	DNA recombination	Probable transcriptional regulatory protein YebC
QI0013_Pat_3552	0	-1.37283	0	-3.25009	0	-2.01794	2.15694	2.08391	DNA PROCESSING	DNA Processing	DNA Processing	DNA Processing	DNA repair	DNA recombination and repair protein RecO
QI0013_Pat_2334	0	1.10624	0	0	0	0	1.34552	1.8336	DNA PROCESSING	DNA Processing	DNA Processing	DNA Processing	DNA repair	Exodeoxyribonuclease VII large subunit (EC 3.1.11.6)
QI0013_Pat_1690	0	1.83483	0	0	0	0	0	0	DNA PROCESSING	DNA Processing	DNA Processing	DNA Processing	DNA repair	Excinuclease ABC subunit C
QI0013_Pat_1990	0	1.54444	0	1.15275	0	1.43836	-0.318993	-0.780905	DNA PROCESSING	DNA Processing	DNA Processing	DNA Processing	DNA repair	Endonuclease Q, cleaves 5' to damaged DNA bases / ATP-dependent DNA helicase UvrD/PcrA-like protein
QI0013_Pat_1611	0	-3.14964	0	0	0	0	1.46256	1.68717	DNA PROCESSING	DNA Processing	DNA Processing	DNA Processing	DNA replication	DNA gyrase subunit B (EC 5.99.1.3)
QI0013_Pat_3549	0	4.37183	0	0	0	0	0	0	DNA PROCESSING	DNA Processing	DNA Processing	DNA Processing	DNA uptake, competence	SSU ribosomal protein S20p
QI0013_Pat_853	0	1.5059	0	0	0	0	-1.02954	-0.987968	DNA PROCESSING	DNA Processing	DNA Processing	DNA Processing	DNA uptake, competence	Ribosomal silencing factor RsfA
QI0013_Pat_1657	0	0	0	1.27955	0	0	-2.28189	-2.17639	DNA PROCESSING	DNA Processing	DNA Processing	DNA Processing	DNA uptake, competence	DNA internalization-related competence protein ComEC/Rec2
QI0013_Pat_741	0	0	0	-6.89378	0	-2.8058	0.309519	-0.789115	ENERGY	Respiration	Respiration	Respiration	Electron accepting reactions	Adenylylsulfate reductase alpha-subunit (EC 1.8.99.2)
QI0013_Pat_3130	15.5674	0	0	0	0	0	2.40191	1.90693	ENERGY	Respiration	Respiration	Respiration	Electron accepting reactions	Anaerobic dimethyl sulfoxide reductase chain C (EC 1.8.5.3), anchor subunit
QI0013_Pat_1926	0	0	0	-2.14186	0	0	0	0	ENERGY	Respiration	Respiration	Respiration	Electron donating reactions	Energy-conserving hydrogenase (ferredoxin), subunit E
QI0013_Pat_1925	0	0	0	-2.14186	0	0	0	0	ENERGY	Respiration	Respiration	Respiration	Electron donating reactions	Energy-conserving hydrogenase (ferredoxin), subunit F
QI0013_Pat_2505	0	-1.66529	0	0	0	0	0	0	METABOLISM	Fatty Acids, Lipids, and Isoprenoids	Fatty Acids, Lipids, and Isoprenoids	Fatty Acids, Lipids, and Isoprenoids	Fatty acids	3-oxoacyl-[acyl-carrier protein] reductase (EC 1.1.1.100), FadG
QI0013_Pat_824	0	-2.11521	0	0	0	0	0	0	ENERGY	Energy and Precursor Metabolites Generation	Energy and Precursor Metabolites Generation	Energy and Precursor Metabolites Generation	Fermentation	Pyruvate formate-lyase activating enzyme (EC 1.97.1.4)
QI0013_Pat_2350	0	4.06503	0	0	0	0	0.826623	1.47622	ENERGY	Energy and Precursor Metabolites Generation	Energy and Precursor Metabolites Generation	Energy and Precursor Metabolites Generation	Fermentation	Alcohol dehydrogenase (EC 1.1.1.1)
QI0013_Pat_1985	0	1.1782	0	0	0	0	1.3359	1.63085	METABOLISM	Cofactors, Vitamins, Prosthetic Groups	Cofactors, Vitamins, Prosthetic Groups	Cofactors, Vitamins, Prosthetic Groups	Folate and pterines	Hypoxanthine-guanine phosphoribosyltransferase (EC 2.4.2.8)
QI0013_Pat_1810	0	-2.16953	0	-1.40901	0	0	0	0	CELL ENVELOPE	Cell Envelope, Capsule and Slime layer	Cell Envelope, Capsule and Slime layer	Cell Envelope, Capsule and Slime layer	Gram-Negative (Diderm) cell wall components	Tol-Pal system peptidoglycan-associated lipoprotein PAL
QI0013_Pat_1177	0	-1.71656	0	0	0	0	-1.92173	-2.28218	CELL ENVELOPE	Cell Envelope, Capsule and Slime layer	Cell Envelope, Capsule and Slime layer	Cell Envelope, Capsule and Slime layer	Gram-Negative (Diderm) cell wall components	UDP-3-O-[3-hydroxymyristoyl] N-acetylglucosamine deacetylase (EC 3.5.1.108)
QI0013_Pat_163	0	1.69781	0	0	0	0	2.23399	2.35685	CELL ENVELOPE	Cell Envelope, Capsule and Slime layer	Cell Envelope, Capsule and Slime layer	Cell Envelope, Capsule and Slime layer	Gram-Negative (Diderm) cell wall components	D-arabinose-5-phosphate isomerase (EC 5.3.1.13)
QI0013_Pat_1070	0	-2.35039	0	-4.20335	0	-4.04422	1.40294	2.14932	METABOLISM	Amino Acids and Derivatives	Amino Acids and Derivatives	Amino Acids and Derivatives	Histidine Metabolism	Phosphoribosylformimino-5-aminoimidazole carboxamide ribotide isomerase (EC 5.3.1.16)
QI0013_Pat_1353	0	0	0	-2.12625	0	0	-2.35316	-2.60267	METABOLISM	Amino Acids and Derivatives	Amino Acids and Derivatives	Amino Acids and Derivatives	Histidine Metabolism	Imidazole glycerol phosphate synthase amidotransferase subunit HisH
QI0013_Pat_1352	0	4.43134	0	-2.12625	0	-2	0	0	METABOLISM	Amino Acids and Derivatives	Amino Acids and Derivatives	Amino Acids and Derivatives	Histidine Metabolism	Imidazole glycerol phosphate synthase cyclase subunit
QI0013_Pat_1333	0	3.17024	0	0	0	0	0.364998	1.14118	METABOLISM	Amino Acids and Derivatives	Amino Acids and Derivatives	Amino Acids and Derivatives	Histidine Metabolism	ATP phosphoribosyltransferase (EC 2.4.2.17) => HisGl
QI0013_Pat_1332	0	3.17024	0	0	0	0	0.247614	0.852119	METABOLISM	Amino Acids and Derivatives	Amino Acids and Derivatives	Amino Acids and Derivatives	Histidine Metabolism	Phosphoribosyl-AMP cyclohydrolase (EC 3.5.4.19)
QI0013_Pat_2380	0	7.76422	0	0	0	0	0	0	METABOLISM	Fatty Acids, Lipids, and Isoprenoids	Fatty Acids, Lipids, and Isoprenoids	Fatty Acids, Lipids, and Isoprenoids	Isoprenoids	1-deoxy-D-xylulose 5-phosphate reductoisomerase (EC 1.1.1.267)
QI0013_Pat_3722	0	-3.66426	0	-3.99316	-5.47852	-4.06059	0	0	METABOLISM	Amino Acids and Derivatives	Amino Acids and Derivatives	Amino Acids and Derivatives	Lysine, threonine, methionine, and cysteine	4-hydroxy-tetrahydrodipicolinate reductase (EC 1.17.1.8)
QI0013_Pat_1830	0	1.31306	0	0	0	0	2.43066	2.85147	METABOLISM	Amino Acids and Derivatives	Amino Acids and Derivatives	Amino Acids and Derivatives	Lysine, threonine, methionine, and cysteine	Sulfate permease
QI0013_Pat_1124	0	-2.2884	0	0	0	0	0	0	METABOLISM	Amino Acids and Derivatives	Amino Acids and Derivatives	Amino Acids and Derivatives	Lysine, threonine, methionine, and cysteine	Aspartokinase (EC 2.7.2.4)
QI0013_Pat_1331	0	2.11775	0	0	0	0	0	0	METABOLISM	Amino Acids and Derivatives	Amino Acids and Derivatives	Amino Acids and Derivatives	Lysine, threonine, methionine, and cysteine	4-hydroxy-tetrahydrodipicolinate synthase (EC 4.3.3.7)
QI0013_Pat_1606	0	3.12569	0	0	0	0	0.105788	0.701497	METABOLISM	Amino Acids and Derivatives	Amino Acids and Derivatives	Amino Acids and Derivatives	Lysine, threonine, methionine, and cysteine	Threonine synthase (EC 4.2.3.1)
QI0013_Pat_1730	0	-2.31159	0	-2.16837	0	-1.49422	0	0	METABOLISM	Carbohydrates	Carbohydrates	Carbohydrates	Monosaccharides	Mannose-1-phosphate guanylyltransferase (EC 2.7.7.13) / Mannose-6-phosphate isomerase (EC 5.3.1.8)
QI0013_Pat_1148	0	0	0	2.32702	2.44777	2.30057	0.383755	0.845298	METABOLISM	Carbohydrates	Carbohydrates	Carbohydrates	Monosaccharides	Mannose-1-phosphate guanylyltransferase (EC 2.7.7.13) / Mannose-6-phosphate isomerase (EC 5.3.1.8)
QI0013_Pat_3269	0	1.40006	0	1.13647	0	1.42557	-1.18342	-1.30452	MEMBRANE TRANSPORT	Membrane Transport	Membrane Transport	Membrane Transport	Multidrug efflux systems	Type I secretion outer membrane protein, TolC family
QI0013_Pat_121	0	0	0	1.9563	0	0	-1.92174	-1.15275	MEMBRANE TRANSPORT	Membrane Transport	Membrane Transport	Membrane Transport	Multidrug efflux systems	Multidrug efflux system EmrAB-OMF, membrane fusion component EmrA
QI0013_Pat_3721	0	-3.66426	0	-3.99316	-5.47852	-4.06059	0.678002	0.585822	METABOLISM	Cofactors, Vitamins, Prosthetic Groups	Cofactors, Vitamins, Prosthetic Groups	Cofactors, Vitamins, Prosthetic Groups	NAD and NADP	NAD synthetase (EC 6.3.1.5) / Glutamine amidotransferase chain of NAD synthetase
QI0013_Pat_2547	0	2.1154	0	2.22895	0	2.32186	-0.588901	-0.383808	METABOLISM	Cofactors, Vitamins, Prosthetic Groups	Cofactors, Vitamins, Prosthetic Groups	Cofactors, Vitamins, Prosthetic Groups	NAD and NADP	Nicotinate-nucleotide adenylyltransferase (EC 2.7.7.18)
QI0013_Pat_862	0	0	0	2.42242	0	3.44261	-1.24295	-0.871728	METABOLISM	Cofactors, Vitamins, Prosthetic Groups	Cofactors, Vitamins, Prosthetic Groups	Cofactors, Vitamins, Prosthetic Groups	NAD and NADP	NAD kinase (EC 2.7.1.23)
QI0013_Pat_3264	0	3.24553	0	0	0	0	-0.812748	-1.49948	METABOLISM	Fatty Acids, Lipids, and Isoprenoids	Fatty Acids, Lipids, and Isoprenoids	Fatty Acids, Lipids, and Isoprenoids	Phospholipids	Alcohol dehydrogenase (EC 1.1.1.1)
QI0013_Pat_1101	0	0	0	0	0	2.12212	-1.00565	-1.0041	METABOLISM	Fatty Acids, Lipids, and Isoprenoids	Fatty Acids, Lipids, and Isoprenoids	Fatty Acids, Lipids, and Isoprenoids	Phospholipids	Alcohol dehydrogenase (EC 1.1.1.1)
QI0013_Pat_842	0	0	0	3.20308	0	2.94802	0.676433	-1.41641	METABOLISM	Fatty Acids, Lipids, and Isoprenoids	Fatty Acids, Lipids, and Isoprenoids	Fatty Acids, Lipids, and Isoprenoids	Phospholipids	Alcohol dehydrogenase (EC 1.1.1.1)
QI0013_Pat_2400	0	0	0	-3.08509	0	-2.68335	0	0	METABOLISM	Amino Acids and Derivatives	Amino Acids and Derivatives	Amino Acids and Derivatives	Proline and 4-hydroxyproline	NADP-specific glutamate dehydrogenase (EC 1.4.1.4)
QI0013_Pat_1904	0	0	0	-1.5389	0	-1	0.656305	1.31756	METABOLISM	Amino Acids and Derivatives	Amino Acids and Derivatives	Amino Acids and Derivatives	Proline and 4-hydroxyproline	Pyridoxal phosphate-containing protein YggS
QI0013_Pat_2322	0	1.37057	0	0	0	0	-2.605	-2.03191	METABOLISM	Amino Acids and Derivatives	Amino Acids and Derivatives	Amino Acids and Derivatives	Proline and 4-hydroxyproline	N-acetylornithine aminotransferase (EC 2.6.1.11)
QI0013_Pat_1163	0	1.28064	0	0	0	1.35445	-0.429705	0.197947	METABOLISM	Amino Acids and Derivatives	Amino Acids and Derivatives	Amino Acids and Derivatives	Proline and 4-hydroxyproline	Glutamate 5-kinase (EC 2.7.2.11) / RNA-binding C-terminal domain PUA
QI0013_Pat_2548	0	2.1154	0	2.22895	0	2.32186	-2.74963	-2.33477	METABOLISM	Amino Acids and Derivatives	Amino Acids and Derivatives	Amino Acids and Derivatives	Proline and 4-hydroxyproline	Gamma-glutamyl phosphate reductase (EC 1.2.1.41)
QI0013_Pat_1482	0	0	0	-3.55166	0	-2.71398	-2.71878	-2.59236	PROTEIN PROCESSING	Protein Fate (folding, modification, targeting, degradation)	Protein Fate (folding, modification, targeting, degradation)	Protein Fate (folding, modification, targeting, degradation)	Protein degradation	ATP-dependent Clp protease proteolytic subunit ClpP (EC 3.4.21.92)
QI0013_Pat_1472	0	-1.73898	0	-4.08058	0	-3.0628	0	0	PROTEIN PROCESSING	Protein Fate (folding, modification, targeting, degradation)	Protein Fate (folding, modification, targeting, degradation)	Protein Fate (folding, modification, targeting, degradation)	Protein folding	Peptidyl-prolyl cis-trans isomerase PpiD (EC 5.2.1.8)
QI0013_Pat_925	0	0	0	-1	0	0	0.697834	1.27632	PROTEIN PROCESSING	Protein Fate (folding, modification, targeting, degradation)	Protein Fate (folding, modification, targeting, degradation)	Protein Fate (folding, modification, targeting, degradation)	Protein folding	Peptidyl-prolyl cis-trans isomerase PpiB (EC 5.2.1.8)
QI0013_Pat_2248	0	1.49847	0	0	0	0	-5.58673	-6.60135	PROTEIN PROCESSING	Protein Fate (folding, modification, targeting, degradation)	Protein Fate (folding, modification, targeting, degradation)	Protein Fate (folding, modification, targeting, degradation)	Protein folding	Chaperone protein ClpB (ATP-dependent unfoldase)
QI0013_Pat_1171	0	-1.18635	0	0	0	0	-3.44607	-4.06009	PROTEIN PROCESSING	Protein Fate (folding, modification, targeting, degradation)	Protein Fate (folding, modification, targeting, degradation)	Protein Fate (folding, modification, targeting, degradation)	Protein folding	Heat shock protein 10 kDa family chaperone GroES
QI0013_Pat_1218	0	-3.52595	0	0	0	0	1.06903	1.65699	PROTEIN PROCESSING	Protein Fate (folding, modification, targeting, degradation)	Protein Fate (folding, modification, targeting, degradation)	Protein Fate (folding, modification, targeting, degradation)	Protein folding	FKBP-type peptidyl-prolyl cis-trans isomerase SlyD (EC 5.2.1.8)
QI0013_Pat_2223	0	0	0	1.83665	0	0	-2.89395	-3.24892	PROTEIN PROCESSING	Protein Fate (folding, modification, targeting, degradation)	Protein Fate (folding, modification, targeting, degradation)	Protein Fate (folding, modification, targeting, degradation)	Protein folding	Heat shock protein GrpE
QI0013_Pat_1338	0	2.87371	0	0	0	1.85925	0	0	PROTEIN PROCESSING	Protein Fate (folding, modification, targeting, degradation)	Protein Fate (folding, modification, targeting, degradation)	Protein Fate (folding, modification, targeting, degradation)	Protein processing and modification	Ribosomal protein S12p Asp88 (E. coli) methylthiotransferase (EC 2.8.4.4)
QI0013_Pat_4404	0	1.91709	0	0	0	0	0.7876	0.513193	MEMBRANE TRANSPORT	Membrane Transport	Membrane Transport	Membrane Transport	Protein secretion system, Type III	Type III secretion outermembrane pore forming protein (YscC,MxiD,HrcC, InvG)
QI0013_Pat_1565	0	-1.83611	0	-3.98112	0	-3.80137	0.925688	1.10305	METABOLISM	Nucleosides and Nucleotides	Nucleosides and Nucleotides	Nucleosides and Nucleotides	Purines	Phosphoribosylamine--glycine ligase (EC 6.3.4.13)
QI0013_Pat_4357	0	1.63222	0	-3.7462	0	-3.42282	1.04024	1.37874	METABOLISM	Nucleosides and Nucleotides	Nucleosides and Nucleotides	Nucleosides and Nucleotides	Purines	Amidophosphoribosyltransferase (EC 2.4.2.14)
QI0013_Pat_4177	0	-2.45603	0	-3.19489	-4.37485	-3.75218	1.37756	1.55983	METABOLISM	Nucleosides and Nucleotides	Nucleosides and Nucleotides	Nucleosides and Nucleotides	Purines	Phosphoribosylaminoimidazole-succinocarboxamide synthase (EC 6.3.2.6)
QI0013_Pat_2185	0	-2.01727	0	0	0	0	0.783765	1.44337	METABOLISM	Nucleosides and Nucleotides	Nucleosides and Nucleotides	Nucleosides and Nucleotides	Purines	Adenylosuccinate lyase (EC 4.3.2.2) @ SAICAR lyase (EC 4.3.2.2)
QI0013_Pat_2205	0	-14.5576	0	0	0	0	1.12178	1.21398	METABOLISM	Nucleosides and Nucleotides	Nucleosides and Nucleotides	Nucleosides and Nucleotides	Purines	IMP cyclohydrolase (EC 3.5.4.10)
QI0013_Pat_918	0	1.57137	0	0	0	0	0	0	METABOLISM	Nucleosides and Nucleotides	Nucleosides and Nucleotides	Nucleosides and Nucleotides	Purines	Xanthine dehydrogenase, molybdenum binding subunit (EC 1.17.1.4)
QI0013_Pat_1879	0	1.83649	0	-6.29021	0	-6.68012	1.56633	1.49464	METABOLISM	Cofactors, Vitamins, Prosthetic Groups	Cofactors, Vitamins, Prosthetic Groups	Cofactors, Vitamins, Prosthetic Groups	Pyridoxine	NAD-dependent glyceraldehyde-3-phosphate dehydrogenase (EC 1.2.1.12)
QI0013_Pat_769	0	-1.34406	0	-2.68228	0	0	-3.01623	-2.71232	METABOLISM	Cofactors, Vitamins, Prosthetic Groups	Cofactors, Vitamins, Prosthetic Groups	Cofactors, Vitamins, Prosthetic Groups	Pyridoxine	D-3-phosphoglycerate dehydrogenase (EC 1.1.1.95)
QI0013_Pat_2260	0	5.83252	0	0	0	0	-5.10548	-5.81281	METABOLISM	Cofactors, Vitamins, Prosthetic Groups	Cofactors, Vitamins, Prosthetic Groups	Cofactors, Vitamins, Prosthetic Groups	Pyridoxine	D-3-phosphoglycerate dehydrogenase (EC 1.1.1.95)
QI0013_Pat_896	0	-2.62714	0	-10.9987	0	-7.85432	1.29179	1.51443	METABOLISM	Nucleosides and Nucleotides	Nucleosides and Nucleotides	Nucleosides and Nucleotides	Pyrimidines	Orotidine 5'-phosphate decarboxylase (EC 4.1.1.23)
QI0013_Pat_2186	0	-3.1161	0	-5.76837	0	-5.34679	1.89607	2.28914	METABOLISM	Nucleosides and Nucleotides	Nucleosides and Nucleotides	Nucleosides and Nucleotides	Pyrimidines	Orotate phosphoribosyltransferase (EC 2.4.2.10)
QI0013_Pat_1138	0	-3.74961	0	-5.13677	0	-4.53703	0.584938	1.02509	METABOLISM	Nucleosides and Nucleotides	Nucleosides and Nucleotides	Nucleosides and Nucleotides	Pyrimidines	Carbamoyl-phosphate synthase small chain (EC 6.3.5.5)
QI0013_Pat_4359	0	-2.02413	0	-4.70407	0	-4.94673	0.603948	1.28624	METABOLISM	Nucleosides and Nucleotides	Nucleosides and Nucleotides	Nucleosides and Nucleotides	Pyrimidines	Carbamoyl-phosphate synthase large chain (EC 6.3.5.5)
QI0013_Pat_2402	0	4.38763	0	0	0	0	0	0	METABOLISM	Nucleosides and Nucleotides	Nucleosides and Nucleotides	Nucleosides and Nucleotides	Pyrimidines	Uracil phosphoribosyltransferase (EC 2.4.2.9)
QI0013_Pat_2403	0	4.38763	0	0	0	0	0	0	METABOLISM	Nucleosides and Nucleotides	Nucleosides and Nucleotides	Nucleosides and Nucleotides	Pyrimidines	Uracil permease @ Uracil:proton symporter UraA
QI0013_Pat_1771	0	-1.01979	0	-4.43539	0	-3.7179	0	0	STRESS RESPONSE, DEFENSE, VIRULENCE	Stress Response, Defense and Virulence	Stress Response, Defense and Virulence	Stress Response, Defense and Virulence	Resistance to antibiotics and toxic compounds	D-alanine--D-alanine ligase (EC 6.3.2.4)
QI0013_Pat_1324	0	-1.53855	0	-2.2805	0	-1.94496	1.84537	2.23645	STRESS RESPONSE, DEFENSE, VIRULENCE	Stress Response, Defense and Virulence	Stress Response, Defense and Virulence	Stress Response, Defense and Virulence	Resistance to antibiotics and toxic compounds	DNA-directed RNA polymerase beta subunit (EC 2.7.7.6)
QI0013_Pat_1311	0	-2.56524	0	0	0	0	0.732448	1.12429	STRESS RESPONSE, DEFENSE, VIRULENCE	Stress Response, Defense and Virulence	Stress Response, Defense and Virulence	Stress Response, Defense and Virulence	Resistance to antibiotics and toxic compounds	Translation elongation factor Tu
QI0013_Pat_2143	0	2.67279	0	0	0	0	0	0	STRESS RESPONSE, DEFENSE, VIRULENCE	Stress Response, Defense and Virulence	Stress Response, Defense and Virulence	Stress Response, Defense and Virulence	Resistance to antibiotics and toxic compounds	Translation elongation factor G
QI0013_Pat_1782	0	0	0	1	0	0	-1.56081	-1.06325	STRESS RESPONSE, DEFENSE, VIRULENCE	Stress Response, Defense and Virulence	Stress Response, Defense and Virulence	Stress Response, Defense and Virulence	Resistance to antibiotics and toxic compounds	Periplasmic divalent cation tolerance protein CutA
QI0013_Pat_2116	0	0	0	3.49305	0	3.28065	-3.82961	-4.28188	STRESS RESPONSE, DEFENSE, VIRULENCE	Stress Response, Defense and Virulence	Stress Response, Defense and Virulence	Stress Response, Defense and Virulence	Resistance to antibiotics and toxic compounds	Response regulator of zinc sigma-54-dependent two-component system
QI0013_Pat_1791	0	3.46721	0	1.53773	0	0	-1.15092	0.096612	METABOLISM	Cofactors, Vitamins, Prosthetic Groups	Cofactors, Vitamins, Prosthetic Groups	Cofactors, Vitamins, Prosthetic Groups	Riboflavin, FMN, FAD	3,4-dihydroxy-2-butanone 4-phosphate synthase (EC 4.1.99.12)
QI0013_Pat_906	0	-2.54832	0	-3.12799	0	-2.78412	1.29845	1.75913	PROTEIN PROCESSING	Protein Synthesis	Protein Synthesis	Protein Synthesis	Ribosome biogenesis	LSU ribosomal protein L9p
QI0013_Pat_2508	0	-3.01975	0	-2.02711	0	-2.07934	0	0	PROTEIN PROCESSING	Protein Synthesis	Protein Synthesis	Protein Synthesis	Ribosome biogenesis	LSU ribosomal protein L32p @ LSU ribosomal protein L32p, zinc-dependent
QI0013_Pat_3638	0	1	0	0	0	0	0	0	PROTEIN PROCESSING	Protein Synthesis	Protein Synthesis	Protein Synthesis	Ribosome biogenesis	Ribosome hibernation promoting factor Hpf
QI0013_Pat_2390	0	-1.5292	0	0	0	0	1.02349	1.11265	PROTEIN PROCESSING	Protein Synthesis	Protein Synthesis	Protein Synthesis	Ribosome biogenesis	SSU ribosomal protein S2p (SAe)
QI0013_Pat_1168	0	-1.4805	0	0	0	0	0.45488	1.45263	PROTEIN PROCESSING	Protein Synthesis	Protein Synthesis	Protein Synthesis	Ribosome biogenesis	LSU ribosomal protein L21p
QI0013_Pat_2313	0	1.21513	0	0	0	0	0.504032	0.984871	PROTEIN PROCESSING	Protein Synthesis	Protein Synthesis	Protein Synthesis	Ribosome biogenesis	LSU ribosomal protein L13p (L13Ae)
QI0013_Pat_4239	0	-1.55117	0	0	0	0	0	0	PROTEIN PROCESSING	Protein Synthesis	Protein Synthesis	Protein Synthesis	Ribosome biogenesis	LSU ribosomal protein L19p
QI0013_Pat_1858	0	-2.71261	0	-3.41066	-3.33864	-2.60029	0.841539	0.848184	RNA PROCESSING	RNA Processing	RNA Processing	RNA Processing	RNA processing and modification	Ribonuclease Y
QI0013_Pat_1129	0	-2.26715	0	-2.29484	0	-2.22093	2.09706	2.49994	RNA PROCESSING	RNA Processing	RNA Processing	RNA Processing	RNA processing and modification	Polyribonucleotide nucleotidyltransferase (EC 2.7.7.8)
QI0013_Pat_1340	0	0	0	-1.6309	0	-1	-1.00565	-0.90993	RNA PROCESSING	RNA Processing	RNA Processing	RNA Processing	RNA processing and modification	tRNA nucleotidyltransferase, CC-adding (EC 2.7.7.72)
QI0013_Pat_1476	0	2.06435	0	0	0	0	0	0	RNA PROCESSING	RNA Processing	RNA Processing	RNA Processing	RNA processing and modification	Ribonuclease E (EC 3.1.26.12)
QI0013_Pat_1474	0	1.86132	0	0	0	0	1.14067	1.54865	RNA PROCESSING	RNA Processing	RNA Processing	RNA Processing	RNA processing and modification	Epoxyqueuosine reductase (EC 1.17.99.6) QueH
QI0013_Pat_3858	0	3.29322	0	0	0	2.0904	2.53895	3.28859	RNA PROCESSING	RNA Processing	RNA Processing	RNA Processing	RNA processing and modification	DEAD-box ATP-dependent RNA helicase DeaD (= CshA) (EC 3.6.4.13)
QI0013_Pat_1852	0	2.84909	0	0	0	1.90751	-1.19741	-0.385953	RNA PROCESSING	RNA Processing	RNA Processing	RNA Processing	RNA processing and modification	7-cyano-7-deazaguanine synthase (EC 6.3.4.20)
QI0013_Pat_4238	0	-1.27678	0	0	0	0	0.235702	0.868408	RNA PROCESSING	RNA Processing	RNA Processing	RNA Processing	RNA processing and modification	Ribonuclease HII (EC 3.1.26.4)
QI0013_Pat_4056	0	19.1682	0	0	0	0	4.77033	4.73252	PROTEIN PROCESSING	Protein Fate (folding, modification, targeting, degradation)	Protein Fate (folding, modification, targeting, degradation)	Protein Fate (folding, modification, targeting, degradation)	Selenoproteins	Glycine/sarcosine/betaine reductase protein A @ selenocysteine-containing
QI0013_Pat_3637	0	3.2601	0	0	0	0	-1.7077	-2.22159	CELLULAR PROCESSES	Cell Cycle, Cell Division and Death	Cell Cycle, Cell Division and Death	Cell Cycle, Cell Division and Death	Stationary phase, Dormancy, Persistence	RNA polymerase sigma-54 factor RpoN
QI0013_Pat_1078	0	0	0	0	0	3.01008	0	0	STRESS RESPONSE, DEFENSE, VIRULENCE	Stress Response, Defense and Virulence	Stress Response, Defense and Virulence	Stress Response, Defense and Virulence	Stress Response	Universal stress protein family
QI0013_Pat_2514	0	1.65076	0	0	0	0	0.341865	0.820758	STRESS RESPONSE, DEFENSE, VIRULENCE	Stress Response, Defense and Virulence	Stress Response, Defense and Virulence	Stress Response, Defense and Virulence	Stress Response	16S rRNA (uracil(1498)-N(3))-methyltransferase (EC 2.1.1.193)
QI0013_Pat_1053	0	1.92117	0	2.04833	0	2.42342	-1.87222	-3.10952	STRESS RESPONSE, DEFENSE, VIRULENCE	Stress Response, Defense and Virulence	Stress Response, Defense and Virulence	Stress Response, Defense and Virulence	Stress Response	Cytochrome c551 peroxidase (EC 1.11.1.5)
QI0013_Pat_4235	15.1133	-1.32623	0	0	0	0	-3.15829	-2.59908	STRESS RESPONSE, DEFENSE, VIRULENCE	Stress Response, Defense and Virulence	Stress Response, Defense and Virulence	Stress Response, Defense and Virulence	Stress Response: Heat/cold shock	tmRNA-binding protein SmpB
QI0013_Pat_4236	0	-1.32623	0	0	0	0	-1.30404	-0.884917	STRESS RESPONSE, DEFENSE, VIRULENCE	Stress Response, Defense and Virulence	Stress Response, Defense and Virulence	Stress Response, Defense and Virulence	Stress Response: Heat/cold shock	16S rRNA (cytidine(1402)-2'-O)-methyltransferase (EC 2.1.1.198)
QI0013_Pat_1227	0	3.15832	0	2.28483	0	1.79778	1.37506	1.59486	STRESS RESPONSE, DEFENSE, VIRULENCE	Stress Response, Defense and Virulence	Stress Response, Defense and Virulence	Stress Response, Defense and Virulence	Stress Response: Heat/cold shock	Ribosomal protein L11 methyltransferase
QI0013_Pat_3538	0	1.74502	0	0	0	0	0	0	METABOLISM	Carbohydrates	Carbohydrates	Carbohydrates	Sugar alcohols	Ethanolamine utilization polyhedral-body-like protein EutS
QI0013_Pat_4153	0	0	0	0	0	2.16592	0	0	METABOLISM	Carbohydrates	Carbohydrates	Carbohydrates	Sugar alcohols	Ethanolamine utilization protein EutA
QI0013_Pat_4154	15.0828	0	0	0	0	0	0	0	METABOLISM	Carbohydrates	Carbohydrates	Carbohydrates	Sugar alcohols	ATP:Cob(I)alamin adenosyltransferase (EC 2.5.1.17) @ ATP:Cob(I)alamin adenosyltransferase (EC 2.5.1.17), ethanolamine utilization
QI0013_Pat_4156	0	1.76682	0	0	0	0	0	0	METABOLISM	Carbohydrates	Carbohydrates	Carbohydrates	Sugar alcohols	Ethanolamine utilization polyhedral-body-like protein EutL
QI0013_Pat_4157	0	1.76682	0	0	0	0	0	0	METABOLISM	Carbohydrates	Carbohydrates	Carbohydrates	Sugar alcohols	Ethanolamine ammonia-lyase light chain (EC 4.3.1.7)
QI0013_Pat_4158	0	1.18721	0	0	0	0	0	0	METABOLISM	Carbohydrates	Carbohydrates	Carbohydrates	Sugar alcohols	Ethanolamine ammonia-lyase heavy chain (EC 4.3.1.7)
QI0013_Pat_456	0	-1.41906	0	-4.38811	0	-2.49322	-2.5844	-3.49885	METABOLISM	Cofactors, Vitamins, Prosthetic Groups	Cofactors, Vitamins, Prosthetic Groups	Cofactors, Vitamins, Prosthetic Groups	Tetrapyrroles	Sirohydrochlorin cobaltochelatase CbiK (EC 4.99.1.3) @ Sirohydrochlorin ferrochelatase activity of CbiK (EC 4.99.1.4)
QI0013_Pat_1912	0	1.55198	0	1.97013	0	0	0	0	METABOLISM	Cofactors, Vitamins, Prosthetic Groups	Cofactors, Vitamins, Prosthetic Groups	Cofactors, Vitamins, Prosthetic Groups	Tetrapyrroles	Siroheme decarboxylase AhbB, alternate heme biosynthesis pathway
QI0013_Pat_1892	0	-4.14107	0	-4.81847	0	0	-3.14555	-2.63773	RNA PROCESSING	RNA Processing	RNA Processing	RNA Processing	Transcription	DNA-directed RNA polymerase omega subunit (EC 2.7.7.6)
QI0013_Pat_1325	0	-1.11393	0	0	0	0	2.34	2.37707	RNA PROCESSING	RNA Processing	RNA Processing	RNA Processing	Transcription	DNA-directed RNA polymerase beta' subunit (EC 2.7.7.6)
QI0013_Pat_1243	0	0	0	-1.5083	0	-1.44016	0	0	PROTEIN PROCESSING	Protein Synthesis	Protein Synthesis	Protein Synthesis	Translation	Methionine aminopeptidase (EC 3.4.11.18)
QI0013_Pat_1838	0	2.55277	0	0	0	0	-1.55192	-1.46574	PROTEIN PROCESSING	Protein Synthesis	Protein Synthesis	Protein Synthesis	Translation	Metal-dependent hydrolase YbeY, involved in rRNA and/or ribosome maturation and assembly
QI0013_Pat_2389	0	-1.5292	0	0	0	0	1.7263	1.86194	PROTEIN PROCESSING	Protein Synthesis	Protein Synthesis	Protein Synthesis	Translation	Translation elongation factor Ts
QI0013_Pat_2384	0	-1.16142	0	0	0	0	0	0	PROTEIN PROCESSING	Protein Synthesis	Protein Synthesis	Protein Synthesis	Translation	Ribosome recycling factor
QI0013_Pat_3196	0	-1.42568	0	0	0	0	0.949351	1.2642	PROTEIN PROCESSING	Protein Synthesis	Protein Synthesis	Protein Synthesis	Translation	Energy-dependent translational throttle protein EttA
QI0013_Pat_1532	0	0	0	-15.9927	-6.21265	-8.95807	1.19277	1.60059						Heterodisulfide reductase, cytochrome reductase subunit
QI0013_Pat_1281	0	-14.5204	0	-15.9453	-4.79637	-6.05241	-0.616883	-0.502665						aminotransferase, class IV
QI0013_Pat_1286	0	-3.29961	0	-15.9236	0	-7.35392	0	0						NLP/P60 family protein
QI0013_Pat_2	0	1.50121	0	-7.30003	0	0	2.2012	2.47664						hypothetical protein
QI0013_Pat_1	0	0	0	-6.47573	0	-4.19736	2.41359	2.7803						hypothetical protein
QI0013_Pat_2237	0	1.50193	0	-6.46079	-4.62144	-5.62434	0.785849	0.564641						molybdenum-pterin binding domain protein/site-specific recombinase, phage integrase family
QI0013_Pat_3320	0	-2.13595	0	-6.07043	0	-4.23218	0	0						FIG049476: HIT family protein
QI0013_Pat_164	0	0	0	-5.87631	0	-6.4008	2.21392	2.46214						hypothetical protein
QI0013_Pat_3152	0	-1.07255	0	-5.17418	0	-4.26558	1.51965	1.99787						NADH-dependent reduced ferredoxin:NADP+ oxidoreductase subunit A
QI0013_Pat_3153	0	-1.07255	0	-5.17418	0	-4.26558	1.80245	2.42585						NADH-dependent reduced ferredoxin:NADP+ oxidoreductase subunit B
QI0013_Pat_1729	0	-3.09766	0	-5	-3.65888	-3	0.763901	0.770187						hypothetical protein
QI0013_Pat_690	0	0	0	-4.83346	0	-4.74674	-2.33313	-1.70904						Transcriptional regulator, GntR family
QI0013_Pat_4358	0	-2.02413	0	-4.70407	0	-4.94673	2.02613	2.80695						hypothetical protein
QI0013_Pat_1772	0	-1.01979	0	-4.43539	0	-3.7179	-0.946437	-0.521795						Metal-dependent phosphohydrolase
QI0013_Pat_1071	0	-2.35039	0	-4.20335	-2.80603	-4.04422	2.11143	2.70758						putative lipoprotein
QI0013_Pat_1986	0	-3.17167	0	-4.02737	-4.41214	-4.46919	0.630265	0.723069						hypothetical protein
QI0013_Pat_4122	0	0	0	-4.00402	-4.41214	-2.43509	-0.738153	-0.895164						Ferric uptake regulation protein FUR
QI0013_Pat_4474	0	-1.11548	0	-3.97247	0	-2.37697	1.91105	2.10169						Formylmethanofuran dehydrogenase associated protein FmdE / Molybdopterin molybdenumtransferase (EC 2.10.1.1)
QI0013_Pat_1835	0	-5.49047	0	-3.96502	-3.02351	0	1.23269	1.08562						OmpA/MotB domain protein
QI0013_Pat_1481	0	-2.87674	0	-3.86177	0	-3.68954	-0.308627	0.417232						Cell division trigger factor (EC 5.2.1.8)
QI0013_Pat_2343	0	-3.05568	0	-3.69836	0	-3.19571	0	0						Transcription elongation factor GreA
QI0013_Pat_1836	0	-4.27852	0	-3.4772	-4.23911	-3.68875	0	0						hypothetical protein
QI0013_Pat_1069	0	1.87711	0	-3.41405	0	-2.69772	1.16625	1.60492						hypothetical protein
QI0013_Pat_1857	0	-2.71261	0	-3.41066	-3.33864	-2.60029	0	0						hypothetical protein
QI0013_Pat_2213	0	-2.4047	0	-3.36922	0	-4.11556	-2.24356	-2.52994						Transcriptional regulator, AcrR family
QI0013_Pat_924	0	-1.50445	0	-3.3578	0	-2.774	1.75548	2.40738						Peptidase, U32 family
QI0013_Pat_3260	0	-1.11019	0	-3.25004	0	0	-1.45087	-1.33443						putative lipoprotein
QI0013_Pat_4178	0	0	0	-3.19489	0	-3.75218	0	0						hypothetical protein
QI0013_Pat_2361	0	-3.13567	0	-3.13602	0	-3.04027	0.842236	1.48295						23S rRNA (uridine(2552)-2'-O)-methyltransferase (EC 2.1.1.166)
QI0013_Pat_1698	0	-1.87544	0	-3.09357	0	-2.9233	-1.09463	-0.742608						ABC-type amino acid transport/signal transduction system, periplasmic component/domain
QI0013_Pat_1697	0	-1.87544	0	-3.09357	0	-2.9233	0	0						hypothetical protein
QI0013_Pat_621	0	-1.26496	0	-2.7517	0	-1.79329	0	0						3',5'-cyclic-nucleotide phosphodiesterase (EC 3.1.4.17)
QI0013_Pat_2214	0	0	0	-2.74587	0	-2.04405	-1.73672	-1.48495						RND efflux system, membrane fusion protein
QI0013_Pat_770	0	-1.34406	0	-2.68228	0	-2.54704	0	0						Transcriptional regulator, GntR family
QI0013_Pat_4125	0	-1.32043	0	-2.61693	0	-2.20263	0	0						Branched-chain amino acid ABC transporter, substrate-binding protein LivJ (TC 3.A.1.4.1)
QI0013_Pat_2896	0	0	0	-2.47836	0	0	0	0						Sensory box histidine kinase
QI0013_Pat_2282	0	0	0	-2.44095	0	-2.14294	-0.447544	0.701813						hypothetical protein
QI0013_Pat_1144	0	1.83838	0	-2.41272	0	-1.75091	-2.49291	-3.31973						ATP-dependent Clp protease ATP-binding subunit ClpA
QI0013_Pat_337	0	-2.53597	0	-2.33442	0	-1.7973	-2.05452	-1.38171						Transcriptional regulator, MarR family
QI0013_Pat_336	0	-2.53597	0	-2.33442	0	-1.7973	0	0						Uncharacterized MFS-type transporter
QI0013_Pat_1351	0	-3.05346	0	-2.32725	0	-2.12228	1.41268	1.18109						TPR repeat
QI0013_Pat_3176	0	-3.58397	0	-2.30085	0	-2.70882	0	0						FIG00602384: hypothetical protein
QI0013_Pat_2215	0	0	0	-2.24613	0	-2.38699	0	0						RND efflux system, inner membrane transporter
QI0013_Pat_2877	0	-1.29117	0	-2.22672	-2.3442	-1.61289	0	0						dinitrogenase iron-molybdenum cofactor protein
QI0013_Pat_2878	0	-1.29117	0	-2.22672	-2.3442	-1.61289	-1.44748	-0.148375						MinD superfamily P-loop ATPase containing an inserted ferredoxin domain
QI0013_Pat_2158	0	-1.65385	0	-2.20768	0	0	0	0						hypothetical protein
QI0013_Pat_2581	0	1.25931	0	-2.1223	0	0	0.652309	1.15379						ABC transporter, ATP-binding protein (cluster 3, basic aa/glutamine/opines)
QI0013_Pat_2034	0	-3.15349	0	-2.07209	0	-1.90679	0	0						hypothetical protein
QI0013_Pat_2035	0	-3.15349	0	-2.07209	0	-1.90679	0	0						Predicted L-lactate dehydrogenase, hypothetical protein subunit YkgG
QI0013_Pat_2509	0	-3.01975	0	-2.02711	0	-2.07934	0	0						FIG01269488: protein, clustered with ribosomal protein L32p
QI0013_Pat_1204	0	3.15085	0	-2.01653	0	0	0	0						Carbon starvation protein A
QI0013_Pat_1438	0	-3.07836	0	-2.01037	0	0	0	0						hypothetical protein
QI0013_Pat_2024	0	0	0	-1.96945	0	-1	-2.85341	-2.50361						Transcriptional regulator, MarR family
QI0013_Pat_2023	0	0	0	-1.96945	0	0	0	0						hypothetical protein
QI0013_Pat_1694	0	0	0	-1.95591	0	0	1.94517	2.35787						ABC transporter, permease protein (cluster 3, basic aa/glutamine/opines)
QI0013_Pat_1695	0	0	0	-1.95591	0	0	1.36298	1.85547						ABC transporter, ATP-binding protein (cluster 3, basic aa/glutamine/opines)
QI0013_Pat_2550	0	-1.37655	0	-1.90035	0	-1.60388	-0.797265	-0.558413						hypothetical protein
QI0013_Pat_3054	0	-1.65943	0	-1.86429	0	0	0	0						transcriptional regulator-like
QI0013_Pat_872	0	-3.458	0	-1.77099	0	-1.7879	0	0						similar to transcription regulator
QI0013_Pat_1521	0	1.49952	0	-1.65064	0	0	0	0						hypothetical protein
QI0013_Pat_1522	0	1.49952	0	-1.65064	0	-1	0	0						Superoxide reductase (EC 1.15.1.2)
QI0013_Pat_2122	0	0	0	-1.6455	0	-1	0	0						putative lipoprotein
QI0013_Pat_2121	0	1.63712	0	-1.47028	0	-1.431	1.52115	0.198242						Membrane-bound lytic murein transglycosylase C (EC 3.2.1.n1)
QI0013_Pat_2410	0	-2.85892	0	-1.36062	0	0	0	0						TRAP-type C4-dicarboxylate transport system, periplasmic component
QI0013_Pat_4169	0	-4.1804	0	-1.33738	0	-1.6529	-0.490909	-1.71373						Superoxide reductase (EC 1.15.1.2)
QI0013_Pat_1868	0	-1.92423	0	-1.33129	0	0	1.53601	1.41755						Predicted glycolate dehydrogenase, 2-subunit type (EC 1.1.99.14), iron-sulfur subunit GlcF
QI0013_Pat_2454	0	-2.00621	0	-1.10511	0	-1.48875	0	0						hypothetical protein
QI0013_Pat_1145	0	3.58645	0	0	0	0	-6.46932	-3.31973						ATP-dependent Clp protease adaptor protein ClpS
QI0013_Pat_1781	0	16.4717	0	0	0	0	-6.74314	-7.1588						hypothetical protein
QI0013_Pat_3700	0	6.27559	0	0	0	0	-3.22545	-3.83622						hypothetical protein
QI0013_Pat_335	0	-1.27079	0	0	0	0	-5.69741	-4.74897						hypothetical protein
QI0013_Pat_3490	0	1.14068	0	0	0	0	-4.88235	-5.29926						TonB-dependent receptor protein
QI0013_Pat_574	0	1.51478	0	0	0	0	-4.85222	-5.45085						Oligopeptide ABC transporter, permease protein OppB (TC 3.A.1.5.1)
QI0013_Pat_3419	0	5.89219	0	0	0	0	-2.68927	-3.16842						hypothetical protein
QI0013_Pat_1777	0	0	0	0	0	2.3767	-4.68356	-6.33578						Nitroreductase
QI0013_Pat_1170	0	-1.18635	0	0	0	0	-4.80404	-5.50136						hypothetical protein
QI0013_Pat_3155	0	1.16078	0	0	0	0	-4.98833	-6.02528						hypothetical protein
QI0013_Pat_3489	0	1.14068	0	0	0	0	-5.32018	-5.56371						ABC transporter, ATP-binding protein (cluster 8, B12/iron complex)
QI0013_Pat_3910	0	7.06941	0	0	0	0	-5.10561	-6.37313						hypothetical protein
QI0013_Pat_1279	0	-2.62325	0	0	-2.74205	0	-3.81973	-4.28547						hypothetical protein
QI0013_Pat_2247	0	2.04422	0	0	0	0	-2.43973	-3.55721						hypothetical protein
QI0013_Pat_4464	0	-1.23824	0	0	0	0	-3.75878	-3.19285						hypothetical protein
QI0013_Pat_3790	0	1.67361	0	0	0	0	-3.82367	-3.85252						Two-component transcriptional response regulator, AtoC family
QI0013_Pat_1431	0	2.11898	0	0	0	0	-3.92728	-3.01805						hypothetical protein
QI0013_Pat_3887	0	1.27944	0	0	0	0	-3.67003	-3.4622						SAM-dependent methyltransferase
QI0013_Pat_3911	0	7.06941	0	0	0	0	-3.42916	-4.33988						CobS-like protein
QI0013_Pat_2291	0	-1.18171	0	0	0	0	-3.66303	-4.29792						Hydroxylamine reductase (EC 1.7.99.1)
QI0013_Pat_329	0	1.63627	0	0	0	0	-2.58158	-2.96134						Transcriptional regulator
QI0013_Pat_2707	0	2.25414	0	0	2.53818	2.06079	-3.47846	-3.59817						Cytochrome c family protein
QI0013_Pat_2706	0	1.65786	0	0	2.53818	1.64144	-3.19739	-3.57225						Electron transport complex protein RnfC
QI0013_Pat_4159	0	-1.82334	0	0	0	0	-1.87751	-1.66038						hypothetical protein
QI0013_Pat_3888	0	1.27944	0	0	0	0	-2.76111	-2.89105						SAM-dependent methyltransferase
QI0013_Pat_2700	0	1.32499	0	0	0	1.76083	-2.71116	-2.73573						Electron transport complex protein RnfB
QI0013_Pat_2444	0	1.20683	0	0	0	0	-2.65252	-2.09383						hypothetical protein
QI0013_Pat_3889	0	2.00117	0	0	0	0	-2.72512	-3.52463						ABC transporter, ATP-binding protein (cluster 8, B12/iron complex)
QI0013_Pat_1185	0	3.04068	0	0	0	0	-2.59627	-2.31362						Efflux pump antibiotic resistance protein
QI0013_Pat_4523	0	-1.00549	0	0	0	0	-2.49519	-2.49766						Transcriptional regulator, AcrR family
QI0013_Pat_1402	0	2.30832	0	0	0	0	-2.82338	-2.69043						O-acetylhomoserine sulfhydrylase (EC 2.5.1.49) @ O-succinylhomoserine sulfhydrylase (EC 2.5.1.48)
QI0013_Pat_626	0	2.53021	0	0	0	0	-3.09045	-3.28873						Transcriptional regulator, NtrC family
QI0013_Pat_4301	0	-1.26017	0	0	0	0	-2.75041	-2.26884						hypothetical protein
QI0013_Pat_3420	0	5.89219	0	0	0	0	-2.01906	-2.25539						hypothetical protein
QI0013_Pat_1106	0	-1.04712	0	0	0	0	-1.86254	-1.99698						hypothetical protein
QI0013_Pat_2017	0	1.13297	0	0	0	0	-1.53277	-1.56223						Two-component system sensor histidine kinase
QI0013_Pat_2702	0	0	0	0	0	3.05266	-3.78918	-3.25648						Electron transport complex protein RnfE
QI0013_Pat_1029	0	-1.62392	0	0	0	0	-2.92203	-2.10414						AzlC family protein
QI0013_Pat_2701	0	3.1519	0	0	0	3.05266	-2.95308	-3.15409						Electron transport complex protein RnfA
QI0013_Pat_2981	0	1.30422	0	0	0	0	-2.81459	-3.54325						hypothetical protein
QI0013_Pat_3984	0	-1.4023	0	0	0	0	-2.59344	-2.2557						hypothetical protein
QI0013_Pat_1524	0	4.87896	0	0	0	0	-1.83873	-1.77156						Membrane-bound lytic murein transglycosylase A
QI0013_Pat_1525	0	4.87896	0	0	0	0	-1.84454	-1.71509						4-hydroxybenzoyl-CoA thioesterase family active site
QI0013_Pat_3267	0	-2.9148	0	0	0	0	-1.40394	-1.46284						hypothetical protein
QI0013_Pat_3585	0	0	0	0	0	1.74347	-0.758478	-0.788285						hypothetical protein
QI0013_Pat_2397	0	3.12678	0	0	0	0	-2.81051	-2.76695						Putative inner membrane protein
QI0013_Pat_3579	0	1.70888	0	0	0	0	-1.10941	-2.25647						NADPH:quinone oxidoreductase
QI0013_Pat_3827	0	3.77778	0	0	0	0	-1.84669	-1.37127						Uncharacterized integral membrane protein GSU2901
QI0013_Pat_3789	0	1.67361	0	0	0	0	0	0						hypothetical protein
QI0013_Pat_3089	15.2426	0	0	0	0	0	-0.87247	-1.26459						L-aspartate oxidase-like protein
QI0013_Pat_2245	0	5.57466	0	0	0	0	-1.47535	-1.70719						ATP/GTP-binding protein
QI0013_Pat_579	0	1.92937	0	0	0	0	-0.668391	-0.978093						hypothetical protein
QI0013_Pat_1721	0	3.09688	0	0	0	0	-0.986265	-1.3167						hypothetical protein
QI0013_Pat_2312	0	-1.1994	0	0	0	0	0	0						Competence protein ComGF
QI0013_Pat_1906	0	1.6176	0	0	0	0	-1.65421	-1.10111						hypothetical protein
QI0013_Pat_481	0	2.4314	0	0	0	0	-1.1273	-1.33753						hypothetical protein
QI0013_Pat_632	0	3.70009	0	0	0	1.76771	-3.3274	-0.850426						Radical SAM domain protein
QI0013_Pat_1051	0	1.66974	0	0	0	0	-1.60604	-1.38215						Rhodanese domain protein
QI0013_Pat_956	0	-1.12563	0	0	0	0	-2.07724	-2.26096						hypothetical protein
QI0013_Pat_1285	0	4.13284	0	0	0	0	-2.10194	-1.89049						hypothetical protein
QI0013_Pat_2129	0	0	0	0	3.83188	0	-0.96546	-1.18488						Intracellular protease
QI0013_Pat_2249	0	1.49847	0	0	0	0	-1.00087	-0.772788						hypothetical protein
QI0013_Pat_281	0	2.09394	0	0	0	0	-2.54908	-2.21254						UPF0047 protein Bsu YugU
QI0013_Pat_1853	0	2.84909	0	0	0	1.90751	-0.649564	-0.976021						N-acetylglucosamine-1-phosphate uridyltransferase (EC 2.7.7.23) / Glucosamine-1-phosphate N-acetyltransferase (EC 2.3.1.157)
QI0013_Pat_4408	0	1.5273	0	0	0	0	-1.16239	-1.52096						hypothetical protein
QI0013_Pat_631	0	1.41685	0	0	0	1.76771	-2.55815	-0.476819						Cytosolic Fe-S cluster assembling factor NBP35
QI0013_Pat_4405	0	1.50973	0	0	0	0	-1.23404	-1.5851						Tir chaperone family protein
QI0013_Pat_828	0	1.9072	0	0	0	0	-1.21364	-0.887771						redox proteins related to the succinate dehydrogenases and fumarate reductases
QI0013_Pat_3955	0	1.68718	0	0	0	0	-1.11949	-0.932253						iron (metal) dependent repressor, DtxR family
QI0013_Pat_780	0	-4.3358	0	0	0	0	0	0						Cytochrome c3
QI0013_Pat_3738	0	1.70797	0	0	0	0	0	0						transcriptional regulator cII, putative
QI0013_Pat_2929	0	2.88904	0	0	0	0	-1.2733	-1.20659						ABC transporter, ATP-binding protein (cluster 10, nitrate/sulfonate/bicarbonate)
QI0013_Pat_4488	0	5.06891	0	0	0	0	-2.23381	-1.74382						hypothetical protein
QI0013_Pat_1437	0	0	0	0	0	-1	-1.92545	-2.45894						hypothetical protein
QI0013_Pat_2841	0	1.17122	0	0	0	0	-1.44731	-1.20245						Polysaccharide deacetylase
QI0013_Pat_4374	0	5.63615	0	0	0	0	-1.71589	-1.26454						Spermidine N1-acetyltransferase (EC 2.3.1.57)
QI0013_Pat_1178	0	-1.71656	0	0	0	0	0.194223	-1.50502						Acetyltransferase
QI0013_Pat_2133	0	3.51084	0	0	0	0	0	0						DNA-binding protein HU
QI0013_Pat_3096	0	3.56004	0	0	0	0	0	0						ABC transporter, substrate-binding protein (cluster 1, maltose/g3p/polyamine/iron)
QI0013_Pat_4413	0	1.43864	0	0	0	0	0	0						hypothetical protein
QI0013_Pat_4431	0	15.7111	0	0	0	0	-0.447535	-1.17082						sigma54 specific transcriptional regulator with PAS sensor, Fis family
QI0013_Pat_1957	0	0	0	0	0	1.71706	-0.66305	-1.76345						Bacterioferritin (EC 1.16.3.1)
QI0013_Pat_2930	0	2.88904	0	0	0	0	-1.27086	-1.17539						ABC transporter, substrate-binding protein (cluster 10, nitrate/sulfonate/bicarbonate)
QI0013_Pat_3640	0	3.28324	0	0	0	0	0	0						Transporter, LysE family
QI0013_Pat_2452	0	1.94573	0	0	0	0	-1.92485	-1.78575						Integral membrane protein TerC
QI0013_Pat_3266	0	-2.9148	0	0	0	0	-1.51005	-1.50615						Sodium/proline symporter
QI0013_Pat_1183	0	-1.69549	0	0	0	0	-1.10643	-1.14337						Protein translocase subunit SecA
QI0013_Pat_2764	16.4756	0	0	0	0	0	-1.35622	-1.31744						Heterodimeric efflux ABC transporter, permease/ATP-binding subunit 2
QI0013_Pat_1424	0	1.52845	0	0	0	0	-1.41839	-0.822511						Putative transmembrane protein
QI0013_Pat_4426	0	1.0955	0	0	0	0	-0.0731321	-0.676292						Sensory box histidine kinase/response regulator
QI0013_Pat_1878	0	1.83649	0	0	0	0	0	0						Fructose-bisphosphate aldolase class II (EC 4.1.2.13)
QI0013_Pat_4412	0	1.52543	0	0	0	0	0	0						hypothetical protein
QI0013_Pat_1105	0	-1.04712	0	0	0	0	-0.778497	-1.10917						Substrate-specific component NikM of nickel ECF transporter
QI0013_Pat_2455	0	-2.38892	0	0	0	0	0	0						Outer membrane lipoprotein
QI0013_Pat_1676	0	9.91386	0	0	5.22251	0	-0.660529	-1.10106						N-acetylmuramoyl-L-alanine amidase (EC 3.5.1.28)
QI0013_Pat_4253	0	7.4236	0	0	0	0	0	0						NUDIX hydrolase
QI0013_Pat_1740	0	2.09578	0	0	0	0	2.01423	2.00873						Glycosyltransferase
QI0013_Pat_169	0	5.10533	0	0	0	0	3.37277	3.4579						hypothetical protein
QI0013_Pat_1880	15.8332	0	0	0	0	0	0	0						FIG00603248: hypothetical protein
QI0013_Pat_1292	0	-14.1807	0	0	0	0	0.81727	1.94571						hypothetical protein
QI0013_Pat_1276	0	17.5319	0	0	0	0	0.701586	0.29549						Uncharacterized protein DVU1046
QI0013_Pat_1819	0	1.01375	0	0	0	0	1.56716	0.816087						Rubredoxin
QI0013_Pat_1861	0	-1.77071	0	0	0	0	1.25795	1.48985						hypothetical protein
QI0013_Pat_3586	0	1.44312	0	0	0	1.74347	3.17803	2.23601						Amidohydrolase-like
QI0013_Pat_1399	0	-1.18533	0	0	0	0	1.1653	2.06829						hypothetical protein
QI0013_Pat_2510	0	1.78879	0	0	0	0	1.8654	2.09892						hypothetical protein
QI0013_Pat_2183	0	-2.01727	0	0	0	0	0.802418	1.44302						hypothetical protein
QI0013_Pat_1843	0	-14.2051	0	0	0	0	1.30919	1.07994						Molybdopterin synthase catalytic subunit MoaE (EC 2.8.1.12)
QI0013_Pat_1739	0	2.09578	0	0	0	0	1.80611	1.84288						Glycosyltransferase
QI0013_Pat_2442	0	0	0	0	4.19085	0	0.23855	0.686007						Transcription accessory protein (S1 RNA-binding domain)
QI0013_Pat_1283	0	1.5702	0	0	0	0	1.14073	1.3782						Glycosyl transferase, group 1 family protein
QI0013_Pat_1737	0	1.15511	0	0	0	0	1.40336	1.41115						hypothetical protein
QI0013_Pat_1203	0	3.15085	0	0	0	0	1.29237	1.40024						Multidrug efflux transporter MdtK/NorM (MATE family)
QI0013_Pat_2005	0	1.09402	0	0	0	0	1.12987	1.488						Branched-chain amino acid ABC transporter, permease protein LivM (TC 3.A.1.4.1)
QI0013_Pat_2184	0	-2.01727	0	0	0	0	0.998663	1.7231						hypothetical protein
QI0013_Pat_1267	0	2.00706	0	0	0	0	1.36247	1.14623						Hemolysins and related proteins containing CBS domains
QI0013_Pat_1165	0	1.82457	0	0	0	0	1.16621	1.72186						hypothetical protein
QI0013_Pat_1308	0	1.39834	0	0	0	0	2.30762	1.89376						hypothetical protein
QI0013_Pat_3058	0	1.47496	0	0	0	0	1.93227	1.92254						SAM-dependent methyltransferase DSY4148 (UbiE paralog)
QI0013_Pat_1612	0	-3.14964	0	0	0	0	1.92731	1.95045						hypothetical protein
QI0013_Pat_1341	0	2.05571	0	0	0	0	1.56627	1.85569						23S rRNA (adenine(2503)-C(2))-methyltransferase @ tRNA (adenine(37)-C(2))-methyltransferase (EC 2.1.1.192)
QI0013_Pat_850	0	1.34842	0	0	0	0	1.13088	1.49188						Acetyltransferase
QI0013_Pat_1457	0	1.33598	0	0	0	0	1.41956	1.38238						Carbon monoxide-induced hydrogenase NuoC-like protein CooU
QI0013_Pat_2096	0	1.53541	0	0	0	0	2.00422	1.79992						putative membrane protein
QI0013_Pat_1130	0	-2.26715	0	0	0	0	0	0						hypothetical protein
QI0013_Pat_1226	0	3.15832	0	0	0	0	1.7313	1.89004						Transcriptional regulator, AraC family
QI0013_Pat_1841	0	-14.2051	0	0	0	0	1.39081	1.59015						Uncharacterized metal-dependent hydrolase YcfH
QI0013_Pat_1166	0	-1.56404	0	0	0	0	1.41858	1.82314						hypothetical protein
QI0013_Pat_3412	0	2.08934	0	0	0	0	2.27125	2.22623						hypothetical protein
QI0013_Pat_1864	0	-1.54715	0	0	0	0	0	0						hypothetical protein
QI0013_Pat_1079	0	0	0	0	0	3.01008	1.93736	1.79012						hypothetical protein
QI0013_Pat_2012	0	2.54499	0	0	0	0	1.80686	2.26979						Peptidyl-tRNA hydrolase (EC 3.1.1.29)
QI0013_Pat_630	0	1.41685	0	0	0	0	0	0						hypothetical protein
QI0013_Pat_2191	0	2.13697	0	0	0	0	3.4069	2.38676						Cytochrome c nitrite reductase, small subunit NrfH
QI0013_Pat_1460	0	0	0	0	4.43321	0	1.87792	1.82904						CO dehydrogenase iron-sulfur protein CooF (EC 1.2.7.4)
QI0013_Pat_2200	0	1.25171	0	0	0	1.90714	0.979903	2.06422						branched-chain amino acid transport
QI0013_Pat_2501	0	-2.46974	0	0	0	0	2.61541	2.53674						dCMP deaminase (EC 3.5.4.12)
QI0013_Pat_1237	0	-2.63937	0	0	0	0	2.14934	2.39082						hypothetical protein
QI0013_Pat_2192	0	2.13697	0	0	0	0	3.38569	2.25211						Cytochrome c552 precursor (EC 1.7.2.2)
QI0013_Pat_1977	0	3.23034	0	0	0	0	2.33158	2.64986						hypothetical protein
QI0013_Pat_2425	0	1.20205	0	0	0	1.54107	2.22301	3.02283						TRAP-type C4-dicarboxylate transport system, small permease component, clustered with pyruvate formate-lyase / TRAP-type C4-dicarboxylate transport system, large permease component, clustered with pyruvate formate-lyase
QI0013_Pat_2381	0	7.76422	0	0	0	0	1.95981	2.61606						hypothetical protein
QI0013_Pat_2629	0	-1.86647	0	0	0	0	2.5439	3.02031						FIG092679: Fe-S oxidoreductase / FIG017108: hypothetical protein
QI0013_Pat_599	0	16.1958	0	0	0	0	4.68602	4.79004						TRAP-type C4-dicarboxylate transport system, periplasmic component
QI0013_Pat_1342	0	1.46473	0	0	0	0	0	0						hypothetical protein
QI0013_Pat_1030	0	-1.62392	0	0	0	0	0	0						hypothetical protein
QI0013_Pat_1045	0	0	0	0	0	2.23116	0	0						MoxR-like ATPases
QI0013_Pat_1052	0	-1	0	0	0	0	0.364064	0.743367						hypothetical protein
QI0013_Pat_1090	0	2.72305	0	0	0	0	0.756282	0.607497						UDP-N-acetylglucosaminuronic acid 4-epimerase (EC 5.1.3.7)
QI0013_Pat_1162	0	1.28064	0	0	0	1.35445	0.068355	0.675893						ADP-L-glycero-D-manno-heptose-6-epimerase (EC 5.1.3.20)
QI0013_Pat_1182	0	-1.69549	0	0	0	0	0.773914	0.175688						hypothetical protein
QI0013_Pat_1198	16.2171	0	0	0	0	0	-0.654099	-1.18488						Thiazole synthase (EC 2.8.1.10)
QI0013_Pat_1200	0	1.6143	0	0	0	0	0	0						Nitroreductase family protein
QI0013_Pat_1213	0	-1.91025	0	0	0	0	0.419372	1.85204						hypothetical protein
QI0013_Pat_1223	0	-1.53527	0	0	0	0	-0.471242	-0.671929						MATE efflux family protein
QI0013_Pat_1232	0	1.71336	0	0	0	0	-1.25127	-1.22328						Carboxyl-terminal protease (EC 3.4.21.102)
QI0013_Pat_1233	0	1.71336	0	0	0	0	-1.11928	-1.03986						hypothetical protein
QI0013_Pat_1284	0	1.5702	0	0	0	0	0	0						hypothetical protein
QI0013_Pat_1290	0	-14.1807	0	0	0	0	0.189376	0.879821						Uncharacterized deacetylase
QI0013_Pat_1291	0	-14.1807	0	0	0	0	0	0						hypothetical protein
QI0013_Pat_1295	15.9237	0	0	0	0	0	0.835717	1.2181						Probable lipoprotein signal peptide
QI0013_Pat_1304	0	0	0	0	0	3.58482	0	0						ABC-type efflux pump permease component YbhS
QI0013_Pat_1309	0	1.39834	0	0	0	0	-0.782177	-0.967234						Phosphomethylpyrimidine synthase ThiC (EC 4.1.99.17)
QI0013_Pat_1310	0	-1.63263	0	0	0	0	-0.944766	-2.01361						FIG015547: peptidase, M16 family
QI0013_Pat_1350	0	15.8189	0	0	0	0	2.7854	1.71378						hypothetical protein
QI0013_Pat_1354	0	1.30994	0	0	0	0	0.816578	-0.296625						Septum-associated rare lipoprotein A
QI0013_Pat_1375	0	9.18921	0	0	0	0	-0.32012	-1.27482						NAD-dependent formate dehydrogenase alpha subunit
QI0013_Pat_1390	0	18.4243	0	0	0	0	0	0						TRAP-type C4-dicarboxylate transport system, periplasmic component
QI0013_Pat_1391	0	18.4243	0	0	0	0	0	0						hypothetical protein
QI0013_Pat_1405	0	4.00084	0	0	0	0	0.757999	0.761344						Uncharacterized protein YaaN
QI0013_Pat_1415	0	-1.59695	0	0	0	0	1.26877	1.11949						Polysulfide reductase PsrA (EC 1.12.98.4), molybdoperterin-binding subunit
QI0013_Pat_1422	0	1.13937	0	0	0	0	1.10342	1.33108						Periplasmic HysAB-type cytochrome-c3 [NiFeSe] hydrogenase, small subunit (EC 1.12.2.1)
QI0013_Pat_1429	0	2.72973	0	0	0	0	-0.10893	0.851439						Spermidine/putrescine import ABC transporter permease protein PotB (TC 3.A.1.11.1)
QI0013_Pat_1456	0	1.33598	0	0	0	0	0	0						Carbon monoxide-induced hydrogenase iron-sulfur protein CooX
QI0013_Pat_1463	0	1.13713	0	0	0	0	0.768069	-0.303355						hypothetical protein
QI0013_Pat_1464	0	1.13713	0	0	0	0	0.0378508	-1.19361						hypothetical protein
QI0013_Pat_1534	0	2.69827	0	0	0	0	-0.615504	-0.200429						Aspartate aminotransferase (EC 2.6.1.1)
QI0013_Pat_1535	0	2.69827	0	0	0	0	0.512053	0.866261						Glucose-6-phosphate isomerase (EC 5.3.1.9)
QI0013_Pat_1541	0	2.4877	0	0	0	0	0	0						D-glycero-beta-D-manno-heptose 1-phosphate adenylyltransferase (EC 2.7.7.70) / D-glycero-beta-D-manno-heptose-7-phosphate kinase (EC 2.7.1.167)
QI0013_Pat_1556	0	2.86244	0	0	0	0	0	0						hypothetical protein
QI0013_Pat_156	0	2.60343	0	0	0	0	0.304528	1.54045						Aminotransferase, class III
QI0013_Pat_157	0	2.60343	0	0	0	0	-0.248877	0.874333						Hydrolase, alpha/beta fold family
QI0013_Pat_1582	0	-1.7746	0	0	0	0	0.800443	0.698868						SrfB
QI0013_Pat_159	0	1.76479	0	0	0	0	1.13287	2.23987						hypothetical protein
QI0013_Pat_160	0	1.76479	0	0	0	0	0.252683	1.19609						DegT/DnrJ/EryC1/StrS aminotransferase
QI0013_Pat_1607	0	3.12569	0	0	0	0	-1.13939	-0.271611						hypothetical protein
QI0013_Pat_1665	0	2.45552	0	0	0	2.40097	0	0						NADP-dependent 3-hydroxy acid dehydrogenase YdfG (EC 1.1.1.381) @ 3-hydroxypropionate dehydrogenase (EC 1.1.1.298)
QI0013_Pat_1689	0	1.83483	0	0	0	0	1.03077	0.850966						Molybdopterin molybdenumtransferase (EC 2.10.1.1) / Periplasmic molybdate-binding domain
QI0013_Pat_1696	0	1.56164	0	0	0	0	0.771261	1.23651						ABC transporter, permease protein (cluster 3, basic aa/glutamine/opines)
QI0013_Pat_1732	0	-1.36178	0	0	0	0	1.15292	1.18259						UDP-glucose 4-epimerase (EC 5.1.3.2)
QI0013_Pat_1738	0	2.09578	0	0	0	0	-0.823621	-0.964855						hypothetical protein
QI0013_Pat_1776	0	0	0	0	0	2.3767	-0.281263	0.454313						Glycosyl transferase, group 1 family protein
QI0013_Pat_1784	0	0	0	0	0	1.88888	1.21715	1.61169						hypothetical protein
QI0013_Pat_1786	0	4.68344	0	0	0	0	1.67253	1.84463						hypothetical protein
QI0013_Pat_1787	0	4.68344	0	0	0	0	0.361507	1.06791						Transcriptional regulator, AcrR family
QI0013_Pat_1826	0	1.02005	0	0	0	0	-0.181439	0.75568						ABC transporter, substrate-binding protein (cluster 3, basic aa/glutamine/opines)
QI0013_Pat_1842	0	-14.2051	0	0	0	0	0	0						hypothetical protein
QI0013_Pat_1898	0	0	0	0	3.6203	0	0.896338	0.963786						hypothetical protein
QI0013_Pat_1899	0	0	0	0	3.6203	0	-0.80132	-0.561823						Threonine/homoserine exporter RhtA
QI0013_Pat_1983	0	1.49808	0	0	0	0	0	0						Thioredoxin family protein
QI0013_Pat_2018	0	1.13297	0	0	4.04409	0	0	0						hypothetical protein
QI0013_Pat_2019	0	0	0	0	4.04409	0	-0.616141	0.522609						Carbon starvation protein A
QI0013_Pat_2030	0	-1.32892	0	0	0	0	0	0						Glycerol-3-phosphate ABC transporter, permease protein UgpA (TC 3.A.1.1.3)
QI0013_Pat_2119	0	3.9289	0	0	0	0	0.875757	-0.136205						Potassium efflux system KefA protein / Small-conductance mechanosensitive channel
QI0013_Pat_2120	0	2.89233	0	0	0	0	1.39783	0.540511						6-phosphogluconolactonase (EC 3.1.1.31), eukaryotic type
QI0013_Pat_2134	0	3.51084	0	0	0	0	1.40046	1.32426						FIG00603599: hypothetical protein
QI0013_Pat_2145	0	1.13831	0	0	0	0	0	0						hypothetical protein
QI0013_Pat_2189	0	2.16817	0	0	0	0	0	0						sensor histidine kinase/response regulator( EC:2.7.3.- )
QI0013_Pat_2201	0	1.25171	0	0	0	1.90714	-0.911586	-0.126776						AzlC family protein
QI0013_Pat_2221	0	0	0	0	0	1.74676	0	0						ABC transporter, ATP-binding protein (cluster 9, phospholipid)
QI0013_Pat_2222	0	3.57916	0	0	0	1.74676	-1.28408	-1.51069						ABC-type transport system involved in resistance to organic solvents, permease component
QI0013_Pat_2273	0	0	0	0	2.70379	0	0	0						hypothetical protein
QI0013_Pat_2280	15.5956	0	0	0	0	0	1.33793	0.27904						hypothetical protein
QI0013_Pat_2286	0	1.552	0	0	0	0	0	0						23S rRNA (cytosine(1962)-C(5))-methyltransferase (EC 2.1.1.191)
QI0013_Pat_2290	0	-1.18171	0	0	0	0	0	0						hypothetical protein
QI0013_Pat_2320	0	1.53638	0	0	0	0	-1.53047	-0.669335						TraR/YbiI family protein
QI0013_Pat_2335	0	4.77957	0	0	0	0	0	0						hypothetical protein
QI0013_Pat_2338	0	1.16212	0	0	0	0	0	0						hypothetical protein
QI0013_Pat_2349	0	4.06503	0	0	0	0	0	0						hypothetical protein
QI0013_Pat_2364	0	-1.32788	0	0	0	0	0.284651	-0.477154						hypothetical protein
QI0013_Pat_2406	0	2.99189	0	0	0	0	0.588865	1.00782						Hypothetical 918 kDa protein Y4LL
QI0013_Pat_2412	0	-1.1363	0	0	0	0	1.00268	1.33156						TRAP-type C4-dicarboxylate transport system, large permease component
QI0013_Pat_2441	0	0	0	0	4.19085	0	0.587706	0.902273						hypothetical protein
QI0013_Pat_2445	0	1.52707	0	0	0	0	0	0						hypothetical protein
QI0013_Pat_2446	0	1.52707	0	0	0	0	-1.11473	-0.749052						hypothetical protein
QI0013_Pat_2448	0	1.17196	0	0	0	0	0	0						membrane proteins related to metalloendopeptidases
QI0013_Pat_2450	0	2.77196	0	0	0	0	0.246293	-0.352005						Septum-associated rare lipoprotein A
QI0013_Pat_2459	0	2.19811	0	0	0	0	0.960311	1.2652						16S rRNA (guanine(527)-N(7))-methyltransferase (EC 2.1.1.170)
QI0013_Pat_2471	0	15.2666	0	0	0	0	0	0						Transcriptional regulator
QI0013_Pat_2479	15.4152	0	0	0	0	0	-1.2475	-0.876278						hypothetical protein
QI0013_Pat_2480	15.4152	0	0	0	0	0	0	0						D-glycero-beta-D-manno-heptose 1-phosphate adenylyltransferase (EC 2.7.7.70) / D-glycero-beta-D-manno-heptose-7-phosphate kinase (EC 2.7.1.167)
QI0013_Pat_2484	0	17.0662	0	0	0	0	-0.560951	0.255807						Arylesterase precursor (EC 3.1.1.2)
QI0013_Pat_2566	0	-1.48846	0	0	0	0	0	0						hypothetical protein
QI0013_Pat_2567	0	-1.48846	0	0	0	0	0	0						Tryptophan synthase (indole-salvaging) (EC 4.2.1.122)
QI0013_Pat_2630	0	-1.86647	0	0	0	0	-0.16675	0.510386						hypothetical protein
QI0013_Pat_2695	0	16.0761	0	0	0	0	0	0						hypothetical protein
QI0013_Pat_2730	0	-1.3101	0	0	0	0	0	0						hypothetical protein
QI0013_Pat_2731	0	-1.20414	0	0	0	0	0	0						hypothetical protein
QI0013_Pat_280	0	2.09394	0	0	0	0	-1.83796	-1.63855						hypothetical protein
QI0013_Pat_2849	0	-1.5967	0	0	0	0	0.702895	0.964315						KH domain RNA binding protein YlqC
QI0013_Pat_2850	0	-1.5967	0	0	0	0	0.774484	1.1184						16S rRNA processing protein RimM
QI0013_Pat_2921	0	1.26449	0	0	0	0	-0.345964	-1.42247						HtrA protease/chaperone protein
QI0013_Pat_3120	0	1.55864	0	0	0	0	1.31091	1.09095						hypothetical protein
QI0013_Pat_3121	0	1.55864	0	0	0	0	0	0						hypothetical protein
QI0013_Pat_3143	0	1.01416	0	0	0	0	0.341383	-0.406104						Membrane-bound lytic murein transglycosylase D
QI0013_Pat_3151	0	1.33554	0	0	0	0	0.724243	1.2479						oxidoreductase, FAD/iron-sulfur cluster-binding domain protein
QI0013_Pat_3156	0	1.16078	0	0	0	0	1.57074	0.853387						Putative periplasmic protein
QI0013_Pat_3160	0	1.41877	0	0	0	0	1.05504	1.49049						Cytosolic Fe-S cluster assembling factor NBP35
QI0013_Pat_3180	0	-1.48484	0	0	0	0	-1.62601	-1.55909						hypothetical protein
QI0013_Pat_3195	0	-1.42568	0	0	0	0	0	0						hypothetical protein
QI0013_Pat_3401	0	1.69167	0	0	0	0	0	0						hypothetical protein
QI0013_Pat_3612	0	1.98612	0	0	0	0	0	0						Proton/glutamate symporter @ Sodium/glutamate symporter
QI0013_Pat_3616	0	6.94238	0	0	0	0	0	0						Integration host factor alpha subunit
QI0013_Pat_3701	0	6.27559	0	0	0	0	0	0						hypothetical protein
QI0013_Pat_3727	16.808	0	0	0	0	0	0	0			Phage			Phage integrase
QI0013_Pat_3728	16.808	0	0	0	0	0	0	0						hypothetical protein
QI0013_Pat_3737	0	1.70797	0	0	0	0	0	0						hypothetical protein
QI0013_Pat_3860	0	4.35417	0	0	2.97222	0	0	0						hypothetical protein
QI0013_Pat_3878	16.7367	0	0	0	0	0	0	0						hypothetical protein
QI0013_Pat_3929	0	1.79416	0	0	0	0	1.70572	1.10692						ATPase
QI0013_Pat_3943	0	0	0	0	0	2.75283	-0.684158	0.28098						Potassium efflux system KefA protein / Small-conductance mechanosensitive channel
QI0013_Pat_3983	0	16.8653	0	0	0	0	0	0						hypothetical protein
QI0013_Pat_4152	0	0	0	0	0	2.16592	0	0						hypothetical protein
QI0013_Pat_4174	0	2.12034	0	0	0	0	1.15387	1.42554						hypothetical protein
QI0013_Pat_4220	0	-1.41171	0	0	0	0	1.54247	1.1347						Multimeric flavodoxin WrbA family protein
QI0013_Pat_4237	0	3.85633	0	0	0	0	0	0						UPF0102 protein YraN
QI0013_Pat_4240	0	-1.55117	0	0	0	0	0	0						hypothetical protein
QI0013_Pat_4252	0	7.4236	0	0	0	0	0.988621	0.615429						Rod shape-determining protein MreB
QI0013_Pat_4254	0	7.4236	0	0	0	0	-0.638691	-0.908601						Ribosomal-protein-S18p-alanine acetyltransferase (EC 2.3.1.128)
QI0013_Pat_4255	0	-2.02373	0	0	0	0	0	0						Triosephosphate isomerase (EC 5.3.1.1)
QI0013_Pat_4256	0	1.91969	0	0	0	0	0	0						Protein translocase membrane subunit SecG
QI0013_Pat_4338	0	2.11436	0	0	0	0	0	0						Capsular polysaccharide export system periplasmic protein KpsD
QI0013_Pat_4407	0	1.5273	0	0	0	0	0.766563	0.0597149						hypothetical protein
QI0013_Pat_4411	0	1.52543	0	0	0	0	1.07573	0.0956092						Type III secretion chaperone protein for YopD (SycD)
QI0013_Pat_4465	0	-1.23824	0	0	0	0	-1.0534	2.27986						hypothetical protein
QI0013_Pat_518	0	1.54485	0	0	0	0	0	0						hypothetical protein
QI0013_Pat_519	0	1.54485	0	0	0	0	0	0						GGDEF domain protein
QI0013_Pat_520	0	-2.83685	0	0	0	0	0	0						hypothetical protein
QI0013_Pat_827	0	1.9072	0	0	0	0	0	0						hypothetical protein
QI0013_Pat_930	0	6.48073	0	0	0	0	0	0						Uncharacterized DUF554 membrane protein
QI0013_Pat_1783	0	0	0	1	0	0	-0.173087	0.442521						Carbohydrate kinase, PfkB family
QI0013_Pat_1492	0	1.27279	0	1.15432	0	0	2.09633	2.07668						hypothetical protein
QI0013_Pat_1038	0	1.82012	0	1.22122	0	0	0	0						hypothetical protein
QI0013_Pat_1039	0	1.82012	0	1.22122	0	0	0	0						diguanylate cyclase/phosphodiesterase (GGDEF & EAL domains) with PAS/PAC sensor(s)
QI0013_Pat_3891	0	2.09952	0	1.22453	0	1.63786	-4.69662	-4.96364						ABC transporter, substrate-binding protein (cluster 8, B12/iron complex)
QI0013_Pat_3890	0	2.00117	0	1.22453	0	1.63786	-4.51433	-4.86678						Iron(III) dicitrate transport system permease protein FecD (TC 3.A.1.14.1)
QI0013_Pat_3535	0	2.85432	0	1.25386	0	1.28964	0.951496	0.480147						UBA/THIF-type NAD/FAD binding protein
QI0013_Pat_3536	0	2.85432	0	1.25386	0	1.28964	1.0836	-0.148681						Aldehyde ferredoxin oxidoreductase (EC 1.2.7.5)
QI0013_Pat_931	0	1.03231	0	1.28986	0	0	0	0						DNA-binding protein HU
QI0013_Pat_4312	0	2.50542	0	1.35589	0	0	-1.98561	-2.24608						hypothetical protein
QI0013_Pat_2284	0	1.24094	0	1.38942	0	0	-4.99933	-5.13993						hypothetical protein
QI0013_Pat_4264	0	5.7728	0	1.39854	0	1.67064	1.47024	1.41777						Uncharacterized UPF0750 membrane protein
QI0013_Pat_4349	0	0	0	1.44757	0	1.35047	-2.58979	-1.90301						hypothetical protein
QI0013_Pat_4348	0	0	0	1.44757	0	1.35047	-1.03454	-0.00113267						Permease of the drug/metabolite transporter (DMT) superfamily
QI0013_Pat_3163	0	0	0	1.46235	0	0	1.53931	1.68283						hypothetical protein
QI0013_Pat_1278	0	-2.62325	0	1.4897	-2.74205	0	-2.48931	-2.47357						hypothetical protein
QI0013_Pat_3491	0	1.18827	0	1.49472	0	1.83654	-4.29121	-4.81396						Aerobic cobaltochelatase CobN subunit (EC 6.6.1.2)
QI0013_Pat_1958	0	0	0	1.50277	0	1.71706	0	0						Na(+)-linked D-alanine glycine permease
QI0013_Pat_1792	0	3.46721	0	1.53773	0	0	-4.66127	-3.43798						hypothetical protein
QI0013_Pat_1640	0	1.29321	0	1.56033	0	0	-1.79223	-1.28161						hypothetical protein
QI0013_Pat_1682	0	2.52177	0	1.58856	0	2.01955	0	0						hypothetical protein
QI0013_Pat_4402	0	5.04903	0	1.6237	0	0	0	0						hypothetical protein
QI0013_Pat_4403	0	5.04903	0	1.6237	0	0	1.15335	0.512378						Type III secretion inner membrane protein (YscD,homologous to flagellar export components)
QI0013_Pat_922	0	1.8347	0	1.63716	0	0	0	0						Xanthine/uracil/thiamine/ascorbate permease family protein
QI0013_Pat_4199	0	3.43967	0	1.65892	0	1.6761	0.696565	0.00632617						hypothetical protein
QI0013_Pat_1306	0	1.69937	0	1.67316	0	0	-1.39764	-2.24076						ABC-type efflux pump membrane fusion component YbhG
QI0013_Pat_2617	0	0	0	1.67439	0	0	-2.04701	-2.85196						Rubrerythrin-like protein DVU2318
QI0013_Pat_1723	0	0	0	1.69475	0	0	0	0						Glycosyltransferase
QI0013_Pat_1724	0	0	0	1.69475	0	0	1.93656	1.50455						Glycosyltransferase
QI0013_Pat_1268	0	2.44083	0	1.79535	0	2.14184	-2.72208	-0.875271						Uncharacterized MFS-type transporter
QI0013_Pat_2427	0	3.39672	0	1.83178	2.58593	2.24036	0	0						Homoserine O-succinyltransferase (EC 2.3.1.46)
QI0013_Pat_3905	0	1.36741	0	1.84874	0	0	-3.43801	-3.64745						HigA
QI0013_Pat_3904	0	1.36741	0	1.84874	0	0	-1.82823	-2.01253						hypothetical protein
QI0013_Pat_2194	0	0	0	1.85691	0	1.74971	-0.786709	-0.547033						Uncharacterized ferredoxin oxidoreductase MJ0100
QI0013_Pat_854	0	3.23628	0	1.90468	0	1.86305	-0.255887	0.445871						Coenzyme A ligase
QI0013_Pat_2428	0	2.65865	0	1.96881	2	2.19368	-1.28607	-1.78029						O-acetylhomoserine sulfhydrylase (EC 2.5.1.49) @ O-succinylhomoserine sulfhydrylase (EC 2.5.1.48)
QI0013_Pat_2429	0	2.65865	0	1.96881	0	2.19368	1.47878	0.392708						Iron-sulfur cluster regulator IscR
QI0013_Pat_1911	0	1.55198	0	1.97013	0	1.72367	-1.02398	-1.12102						hypothetical protein
QI0013_Pat_812	0	1.58593	0	2.06143	0	0	0.815931	0.084146						Large extracellular alpha-helical protein
QI0013_Pat_1615	0	3.65198	0	2.07377	0	1.9386	1.57946	0.729977						Peptidase, M23/M37 family
QI0013_Pat_2275	0	3.39674	0	2.07674	0	2.72411	0	0						ABC transporter, substrate-binding protein (cluster 11, riboflavin/purine nucleoside/unknown)
QI0013_Pat_2148	0	2.09827	0	2.09335	2.81325	2.20284	0	0						SAM-dependent methyltransferase
QI0013_Pat_3122	0	1.55864	0	2.10269	0	1.65123	1.53251	1.65084						Methionine ABC transporter substrate-binding protein
QI0013_Pat_3123	0	0	0	2.10269	0	1.65123	1.10179	1.34352						Methionine ABC transporter permease protein
QI0013_Pat_3124	0	0	0	2.10269	0	0	0	0						Methionine ABC transporter ATP-binding protein
QI0013_Pat_2569	0	-2.63459	0	2.1383	0	0	1.66483	2.11645						TRAP-type uncharacterized transport system, fused permease component
QI0013_Pat_2570	0	1.2002	0	2.1383	0	0	0	0						TRAP transporter solute receptor, TAXI family precursor
QI0013_Pat_1160	0	0	0	2.14989	0	0	1.41945	1.87836						membrane protein involved in aromatic hydrocarbon degradation
QI0013_Pat_1159	0	0	0	2.14989	0	0	0	0						membrane protein involved in aromatic hydrocarbon degradation
QI0013_Pat_4397	0	0	0	2.1637	0	2.31075	1.59006	1.65216						hypothetical protein
QI0013_Pat_2006	0	0	0	2.18134	0	0	0.151489	0.923744						Branched-chain amino acid ABC transporter, permease protein LivH (TC 3.A.1.4.1)
QI0013_Pat_1406	0	2.11782	0	2.19636	0	2.37417	1.34879	1.21172						hypothetical protein; Unknown protein. Hypothetical transmembrane protein
QI0013_Pat_874	0	0	0	2.23143	0	2.14755	0	0						Inner membrane protein YbaL, KefB/KefC family
QI0013_Pat_2188	0	2.16817	0	2.28525	0	2.46801	0.782813	1.04344						sigma-54 dependent DNA-binding response regulator
QI0013_Pat_3614	0	0	0	2.29571	0	0	-0.14825	-0.839775						Demethylmenaquinone methyltransferase (EC 2.1.1.163)
QI0013_Pat_3615	0	0	0	2.29571	0	0	1.52078	0.817535						hypothetical protein
QI0013_Pat_1149	0	0	0	2.32702	2.44777	2.30057	0.446942	0.633148						General secretion pathway protein A
QI0013_Pat_1909	0	0	0	2.32857	0	0	-0.782599	-0.339066						Hydantoinase/oxoprolinase family protein
QI0013_Pat_863	0	3.22953	0	2.42242	3.11642	3.44261	-0.765041	-0.414639						hypothetical protein
QI0013_Pat_3092	0	3.75237	0	2.47619	0	2.31597	0	0						UPF0386 protein YjhX
QI0013_Pat_1047	0	0	0	2.57128	0	0	0	0						hypothetical protein
QI0013_Pat_2699	0	1.32499	0	2.59902	2.87521	2.95815	-2.47894	-2.80309						FAD:protein FMN transferase (EC 2.7.1.180) @ FAD:protein FMN transferase (EC 2.7.1.180), RnfDG-associated
QI0013_Pat_1112	0	0	0	2.62716	0	2.56243	-1.45748	-1.66731						RND efflux system, membrane fusion protein
QI0013_Pat_1111	0	0	0	2.62716	0	2.56243	0	0						hypothetical protein
QI0013_Pat_2615	0	0	0	2.75979	0	2.38108	0.560866	0.98068						Low-specificity L-threonine aldolase (EC 4.1.2.48)
QI0013_Pat_107	0	4.43048	0	3.02181	0	0	0	0						hypothetical protein
QI0013_Pat_123	0	0	0	3.0284	0	0	0	0						Transcriptional regulator, AcrR family
QI0013_Pat_124	0	0	0	3.0284	0	0	0	0						hypothetical protein
QI0013_Pat_1305	0	1.69937	0	3.46615	3.58396	3.58482	0.902534	0.523545						ABC-type efflux pump, duplicated ATPase component YbhF
QI0013_Pat_317	0	4.81668	0	3.72366	0	2.35234	-3.491	-3.74035						hypothetical protein
QI0013_Pat_318	0	4.81668	0	3.72366	0	0	-2.58348	-3.18794						hypothetical protein
QI0013_Pat_899	0	0	2	0	0	0	0	0	PROTEIN PROCESSING	Protein Fate (folding, modification, targeting, degradation)	Protein Fate (folding, modification, targeting, degradation)	Protein Fate (folding, modification, targeting, degradation)	Protein folding	Peptidyl-prolyl cis-trans isomerase PpiB (EC 5.2.1.8)
QI0013_Pat_2582	0	0	2.54788	0	0	0	0	0						ABC transporter, permease protein (cluster 3, basic aa/glutamine/opines)
QI0013_Pat_2561	0	1.9192	2.6032	1.62282	0	1.74346	1.5019	1.52024						Coenzyme A ligase
QI0013_Pat_2560	0	15.2752	2.6032	1.62282	0	1.74346	1.70201	1.50356						hypothetical protein
QI0013_Pat_3194	0	1.94329	2.63558	0	0	1.63915	-1.57288	-0.214032						hypothetical protein
QI0013_Pat_3193	0	1.94329	2.63558	0	0	1.63915	0	0						nuclease domain protein
QI0013_Pat_3486	0	4.13909	2.80761	1.87883	0	2.11816	-3.48289	-2.87939						Efflux ABC transporter, permease protein
QI0013_Pat_3485	0	4.13909	2.80761	1.87883	0	2.11816	-3.33584	-2.41598						putative TonB-dependent receptor
QI0013_Pat_1473	0	1.86132	2.86708	0	0	0	1.76214	2.22688						Glycosyl transferase family protein
QI0013_Pat_3863	0	3.01111	2.8938	0	0	0	0	0						TRAP-type C4-dicarboxylate transport system, periplasmic component, clustered with pyruvate formate-lyase
QI0013_Pat_2517	0	1.14906	3	0	0	0	-3.5743	-3.55852	METABOLISM	Nucleosides and Nucleotides	Nucleosides and Nucleotides	Nucleosides and Nucleotides	Purines	Glutamine amidotransferase, class I
QI0013_Pat_2072	0	1.04002	3	0	0	0	1.98141	2.24909						Branched-chain amino acid ABC transporter, permease protein LivM (TC 3.A.1.4.1)
QI0013_Pat_2470	0	0	3	0	0	0	0	0						Uncharacterized amino acid permease, GabP family
QI0013_Pat_2071	0	1.56067	3	1.62811	0	1.60681	2.17227	2.47335						Branched-chain amino acid ABC transporter, permease protein LivH (TC 3.A.1.4.1)
QI0013_Pat_395	0	1.32649	3	1.74398	0	1.85716	-0.806038	-0.51255						Sensory box/GGDEF family protein
QI0013_Pat_1674	0	2.76394	3	2.29713	3	2.19329	-0.341611	-0.842148						Activator of (R)-2-hydroxyglutaryl-CoA dehydratase
QI0013_Pat_2102	0	0	3.04029	0	2.87327	0	0	0						hypothetical protein
QI0013_Pat_2103	0	0	3.04029	0	2.87327	0	-0.861641	-0.454207						3'-5' exonuclease
QI0013_Pat_1595	0	1.04939	3.05993	0	3.49435	0	0	0						hypothetical protein
QI0013_Pat_1596	0	1.04939	3.05993	0	3.49435	0	0	0						hypothetical protein
QI0013_Pat_9	0	0	3.24315	0	0	0	0	0						peptidase M20
QI0013_Pat_2576	0	1.29715	3.30873	1.62218	0	0	1.04084	2.15621	STRESS RESPONSE, DEFENSE, VIRULENCE	Stress Response, Defense and Virulence	Stress Response, Defense and Virulence	Stress Response, Defense and Virulence	Resistance to antibiotics and toxic compounds	Transcription termination factor Rho
QI0013_Pat_2575	0	1.29715	3.30873	1.62218	0	0	0	0						hypothetical protein
QI0013_Pat_2834	0	1.35271	3.3202	0	3.05802	0	1.92857	1.66218						hypothetical protein
QI0013_Pat_2835	0	0	3.3202	0	3.05802	0	0	0						hypothetical protein
QI0013_Pat_3810	0	1.71957	3.3372	1.71693	0	0	-5.90776	-6.16604						hypothetical protein
QI0013_Pat_2089	0	0	3.40592	0	0	0	1.92016	2.37757	RNA PROCESSING	RNA Processing	RNA Processing	RNA Processing	RNA processing and modification	tRNA pseudouridine(38-40) synthase (EC 5.4.99.12)
QI0013_Pat_2710	0	3.42202	3.49086	1.17892	2.38585	1.37143	-5.37381	-5.55472						[FeFe]-hydrogenase maturation protein HydG
QI0013_Pat_277	0	0	3.49302	0	2.64656	0	0.778324	0.932036						Formylmethanofuran dehydrogenase associated protein FmdE / Molybdopterin molybdenumtransferase (EC 2.10.1.1)
QI0013_Pat_3290	0	1.92245	3.51113	0	0	0	0.812567	0.970933	PROTEIN PROCESSING	Protein Synthesis	Protein Synthesis	Protein Synthesis		Ribosome LSU-associated GTP-binding protein HflX
QI0013_Pat_1989	0	1.54444	3.51671	0	3.55203	1.43836	0	0						Regulator of competence-specific genes
QI0013_Pat_1988	0	0	3.51671	0	3.55203	2.39999	-1.12329	-0.785705						hypothetical protein
QI0013_Pat_852	0	1.5059	3.51981	0	0	0	1.34493	1.52516						2,3-bisphosphoglycerate-independent phosphoglycerate mutase (EC 5.4.2.12)
QI0013_Pat_851	0	0	3.51981	0	0	0	1.49639	1.54211						hypothetical protein
QI0013_Pat_2066	0	-14.8989	3.58117	-15.9998	0	-7.21502	1.02768	1.08196						Coenzyme A ligase
QI0013_Pat_2483	0	17.0662	3.68944	0	0	0	-3.01999	-2.97757	PROTEIN PROCESSING	Protein Synthesis	Protein Synthesis	Protein Synthesis	Aminoacyl-tRNA-synthetases	Cys-tRNA(Pro) deacylase YbaK
QI0013_Pat_2482	0	0	3.68944	0	0	0	0	0	PROTEIN PROCESSING	Protein Synthesis	Protein Synthesis	Protein Synthesis	Aminoacyl-tRNA-synthetases	Tyrosyl-tRNA synthetase (EC 6.1.1.1)
QI0013_Pat_1884	0	8.92935	3.70873	0	5.45253	0	-4.43948	-4.36823						tRNA-dihydrouridine synthase DusB
QI0013_Pat_1411	0	0	3.72579	2.87155	0	0	0	0						hypothetical protein
QI0013_Pat_1677	0	9.91386	3.73579	0	5.22251	0	0	0						Auxin efflux carrier family protein
QI0013_Pat_4427	0	1.0955	3.75188	0	0	0	-0.324986	-0.88091	STRESS RESPONSE, DEFENSE, VIRULENCE	Stress Response, Defense and Virulence	Stress Response, Defense and Virulence	Stress Response, Defense and Virulence	Resistance to antibiotics and toxic compounds	Response regulator of zinc sigma-54-dependent two-component system
QI0013_Pat_3861	0	4.35417	3.78268	0	2.97222	0	0	0						hypothetical protein
QI0013_Pat_2433	0	-5.37048	3.82472	-7.37685	0	-5.5521	1.72126	2.08989						Protein translocase subunit SecF
QI0013_Pat_2434	0	0	3.82472	0	2.78659	0	0.942949	1.59542						Cobalt-zinc-cadmium resistance protein
QI0013_Pat_1839	0	1.09158	3.86037	0	0	0	0.604233	0.837991						Membrane protein containing HD superfamily hydrolase domain, YQFF ortholog
QI0013_Pat_1840	0	0	3.86037	0	0	0	-0.909688	-0.900267						Phosphate starvation-inducible protein PhoH, predicted ATPase
QI0013_Pat_4385	0	0	3.88834	2.29984	0	0	2.24786	1.80583						Split-Soret cytochrome c
QI0013_Pat_1421	0	3.32865	3.92747	0	2.90688	0	2.30473	2.69025	PROTEIN PROCESSING	Protein Fate (folding, modification, targeting, degradation)	Protein Fate (folding, modification, targeting, degradation)	Protein Fate (folding, modification, targeting, degradation)	Selenoproteins	Periplasmic HysAB-type cytochrome-c3 [NiFeSe] hydrogenase, large subunit (EC 1.12.2.1) @ selenocysteine-containing
QI0013_Pat_1420	0	3.32865	3.92747	0	2.90688	0	0	0						hypothetical protein
QI0013_Pat_986	0	0	3.93585	0	0	0	0	0						Phosphate transport regulator (distant homolog of PhoU)
QI0013_Pat_2274	0	3.39674	4.04521	2.07674	2.70379	2.72411	1.21413	1.38531						membrane protein, Bmp family
QI0013_Pat_54	0	0	4.05448	1.70159	2.61014	2.19881	-4.32162	-4.71369						Two-component transcriptional response regulator, AtoC family
QI0013_Pat_1235	0	0	4.08305	0	3.6637	0	1.84381	1.565						Signal transduction protein containing GAF and PtsI domains
QI0013_Pat_1234	0	0	4.08305	0	3.6637	0	0	0						Pyrroline-5-carboxylate reductase (EC 1.5.1.2)
QI0013_Pat_1344	0	1.92625	4.15228	1.74239	0	1.74034	0	0	METABOLISM	Amino Acids and Derivatives	Amino Acids and Derivatives	Amino Acids and Derivatives	Aromatic amino acids and derivatives	3-dehydroquinate synthase II (EC 1.4.1.24)
QI0013_Pat_4398	0	0	4.15455	2.1637	0	2.31075	1.06854	1.15217	MEMBRANE TRANSPORT	Membrane Transport	Membrane Transport	Membrane Transport	Protein secretion system, Type III	Type III secretion bridge between inner and outermembrane lipoprotein (YscJ,HrcJ,EscJ, PscJ)
QI0013_Pat_4399	0	0	4.15455	0	0	0	0	0						hypothetical protein
QI0013_Pat_2982	0	1.30422	4.17664	1	3.40125	0	0	0	ENERGY	Energy and Precursor Metabolites Generation	Energy and Precursor Metabolites Generation	Energy and Precursor Metabolites Generation	Fermentation	Alcohol dehydrogenase (EC 1.1.1.1)
QI0013_Pat_2705	0	1.65786	4.18001	0	0	1.64144	-2.80427	-2.73644						hypothetical protein
QI0013_Pat_1651	0	-7.02198	4.19561	-6.52322	-6.06761	-5.78969	-0.624629	-0.8529						Putative DNA-binding protein
QI0013_Pat_1506	0	0	4.27368	0	0	0	1.02067	1.55989						Hydrolase, haloacid dehalogenase-like family
QI0013_Pat_2031	0	-1.32892	4.2952	0	0	0	0	0						Glycerol-3-phosphate ABC transporter, substrate-binding protein UgpB
QI0013_Pat_1704	0	0	4.30337	0	3.70381	0	-1.69672	-1.36325						ATP-dependent RNA helicase, DEAD/DEAH box family
QI0013_Pat_2708	6.15815	1.11789	4.31446	1.33089	2.59139	1.43292	-3.21278	-3.90516						Periplasmic [FeFe] hydrogenase small subunit (EC 1.12.7.2)
QI0013_Pat_2709	6.15815	1.51303	4.31446	1.33089	2.59139	1.43292	-3.9508	-4.65232						Periplasmic [FeFe] hydrogenase large subunit (EC 1.12.7.2)
QI0013_Pat_2375	0	0	4.31962	0	0	0	0	0	METABOLISM	Cofactors, Vitamins, Prosthetic Groups	Cofactors, Vitamins, Prosthetic Groups	Cofactors, Vitamins, Prosthetic Groups	Tetrapyrroles	Porphobilinogen synthase (EC 4.2.1.24)
QI0013_Pat_3886	0	2.34921	4.35401	0	0	0	-5.63747	-6.4632						Nickel ABC transporter, substrate-binding protein NikA (TC 3.A.1.5.3)
QI0013_Pat_3885	0	2.34921	4.35401	0	0	0	-3.4494	-3.51288						Nickel ABC transporter, permease protein NikB (TC 3.A.1.5.3)
QI0013_Pat_3118	0	0	4.43709	0	0	2.88944	-0.754951	-0.606786						Two-component system sensor histidine kinase
QI0013_Pat_2792	0	0	4.58962	0	0	0	0	0						hypothetical protein
QI0013_Pat_148	0	0	4.59315	0	0	0	0.512618	0.827278						HIPA PROTEIN
QI0013_Pat_695	0	0	4.76733	0	0	0	0	0						hypothetical protein
QI0013_Pat_1684	0	0	4.78317	0	3.90515	0	-1.58085	-1.47666						TPR domain protein
QI0013_Pat_1683	0	2.52177	4.78317	1.58856	3.90515	2.01955	0	0						hypothetical protein
QI0013_Pat_3644	6.24236	0	4.82104	0	4.66415	0	-1.33432	-2.15717			Phage			Phage protein
QI0013_Pat_2562	5.85324	2.3071	4.86111	0	3.2224	0	0	0						Uncharacterized protein MK1497
QI0013_Pat_2563	5.85324	2.3071	4.86111	0	3.2224	0	0	0						hypothetical protein
QI0013_Pat_2513	0	0	4.87951	0	0	0	0	0						FIG00602955: hypothetical protein
QI0013_Pat_2211	0	4.05099	4.95056	3	4	3	1.18279	1.04963						isopropylmalate/homocitrate/citramalate synthase-like protein
QI0013_Pat_1131	0	6.18794	5	0	0	0	-1.86223	-1.95947						Type IV pilus biogenesis protein PilM
QI0013_Pat_2405	6.39629	2.99189	5.04312	1.60986	3.59525	0	0	0	DNA PROCESSING	DNA Processing	DNA Processing	DNA Processing	DNA repair	ADP-ribose pyrophosphatase of COG1058 family (EC 3.6.1.13) / Nicotinamide-nucleotide amidase (EC 3.5.1.42)
QI0013_Pat_1688	0	0	5.12827	0	4.14606	0	0	0						Acetyltransferase, GNAT family
QI0013_Pat_2008	0	1.75132	5.13783	0	0	0	0	0						hypothetical protein
QI0013_Pat_2007	0	1.41412	5.13783	0	0	0	0	0						Branched-chain amino acid ABC transporter, substrate-binding protein LivJ (TC 3.A.1.4.1)
QI0013_Pat_3845	0	0	5.32509	0	3.77765	0	0	0						PAS
QI0013_Pat_3846	0	0	5.32509	0	0	0	0	0						Two-component transcriptional response regulator, AtoC family
QI0013_Pat_693	0	0	5.33347	0	0	0	-2.17066	-1.8263						ABC transporter, substrate-binding protein (cluster 15, trp?)
QI0013_Pat_2874	0	0	5.6444	0	0	0	-1.16444	-0.26971						Transcriptional regulatory protein RtcR
QI0013_Pat_2875	0	0	5.6444	0	0	0	-1.89072	-0.110707						hypothetical protein
QI0013_Pat_1829	0	1.63673	5.68904	2.29754	4.50109	2.05466	2.19544	2.34278						Glutamine ABC transporter, permease protein GlnP
QI0013_Pat_4467	0	0	5.87864	0	0	0	0.712407	1.08235	PROTEIN PROCESSING	Protein Synthesis	Protein Synthesis	Protein Synthesis	Aminoacyl-tRNA-synthetases	Ser-tRNA(Ala) deacylase @ Gly-tRNA(Ala) deacylase
QI0013_Pat_4468	0	0	5.87864	0	3.85802	0	0	0	RNA PROCESSING	RNA Processing	RNA Processing	RNA Processing	RNA processing and modification	Rossmann fold nucleotide-binding protein Smf possibly involved in DNA uptake
QI0013_Pat_3086	7.37184	1.96814	5.96553	1.76628	4.11575	1.82102	0	0						Alkanesulfonates-binding protein
QI0013_Pat_2703	0	3.81437	6.235	3.52383	5.97853	3.96828	-3.69286	-4.04332						Electron transport complex protein RnfG
QI0013_Pat_2704	0	3.81437	6.235	3.52383	5.97853	3.96828	-2.39779	-3.29225						Electron transport complex protein RnfD
QI0013_Pat_3971	0	0	6.55901	0	4.35905	0	1.25852	1.00116						hypothetical protein
QI0013_Pat_3972	0	0	6.55901	0	4.35905	0	0.641245	0.848744						hypothetical protein
QI0013_Pat_1229	0	0	6.71232	0	0	0	-0.91793	-1.18203	ENERGY	Energy and Precursor Metabolites Generation	Energy and Precursor Metabolites Generation	Energy and Precursor Metabolites Generation	Central Metabolism	NADP-dependent malic enzyme (EC 1.1.1.40)
QI0013_Pat_1228	0	2.15751	6.71232	2.28483	0	1.79778	0	0						ABC transporter, ATP-binding protein (cluster 3, basic aa/glutamine/opines)
QI0013_Pat_616	0	0	6.72183	0	5.9686	0	-1.44714	-1.77849						hypothetical protein
QI0013_Pat_4517	0	0	6.77374	0	0	0	2.3876	1.86076						Circadian phase modifier
QI0013_Pat_4401	0	0	7.12515	0	0	0	1.52934	0.807681						Type III secretion system protein, YscF family
QI0013_Pat_376	6.57484	2	7.1761	0	4.34983	0	1.96886	1.36033						VCBS
QI0013_Pat_926	0	0	7.23984	0	5.15642	0	0	0	DNA PROCESSING	DNA Processing	DNA Processing	DNA Processing	DNA repair	A/G-specific adenine glycosylase (EC 3.2.2.-)
QI0013_Pat_3363	8.58043	0	7.45412	0	5.00415	0	-2.17014	-2.03088			Phage			Phage antirepressor protein
QI0013_Pat_1477	6.86308	0	7.46972	0	5.82179	0	-1.38729	-1.10819						Ser/Thr protein phosphatase family protein
QI0013_Pat_1598	0	0	7.54899	0	0	0	-0.238024	-1.21612						hypothetical protein
QI0013_Pat_3090	0	0	7.83042	0	0	0	-0.499937	-1.45036						Two-component system response regulator protein
QI0013_Pat_1335	9.65278	0	7.92038	0	6.2833	0	-1.50897	-1.61031						23S rRNA (pseudouridine(1915)-N(3))-methyltransferase (EC 2.1.1.177)
QI0013_Pat_1518	10.6309	0	9.19138	0	6	0	0	0	ENERGY	Respiration	Respiration	Respiration	Electron donating reactions	Fumarate reductase iron-sulfur protein (EC 1.3.5.4)
QI0013_Pat_330	0	0	9.76309	0	0	0	0	0						Transcriptional regulator
QI0013_Pat_3492	0	0	15.172	0	0	0	-3.86037	-4.25122						ChlI component of cobalt chelatase involved in B12 biosynthesis / ChlD component of cobalt chelatase involved in B12 biosynthesis
QI0013_Pat_1211	0	0	15.592	0	0	0	-3.96025	-3.9325						hypothetical protein
QI0013_Pat_1303	0	0	15.963	0	0	0	0	0						ABC-type efflux pump permease component YbhR
QI0013_Pat_4394	17.0679	0	16.1664	0	2.89867	2.51947	0.78196	0.837847	MEMBRANE TRANSPORT	Membrane Transport	Membrane Transport	Membrane Transport	Protein secretion system, Type III	Type III secretion cytoplasmic ATP synthase (EC 3.6.3.14, YscN,SpaL,MxiB,HrcN,EscN)
QI0013_Pat_4393	0	0	16.1664	0	2.89867	2.51947	1.17929	1.13893						Type III secretion spans bacterial envelope protein (YscO)
QI0013_Pat_1519	15.4154	4.59378	16.2661	0	16.0609	0	0	0	ENERGY	Respiration	Respiration	Respiration	Electron donating reactions	Fumarate reductase flavoprotein subunit (EC 1.3.5.4)
QI0013_Pat_765	0	0	16.3733	0	0	0	0	0	ENERGY	Energy and Precursor Metabolites Generation	Energy and Precursor Metabolites Generation	Energy and Precursor Metabolites Generation	Central Metabolism	Glycolate dehydrogenase (EC 1.1.99.14), subunit GlcD
QI0013_Pat_1515	18.3191	15.2906	17.6712	0	17.5751	0	0	0						Transporter, sodium/sulfate symporter family

## Sheet: SupplementaryTable2
Supplementary table 2: Features identified as important based on one-way ANOVA and FISHER's post-hoc analysis on concentrations normalized based on stool weight
Metabolite	f.value	p.value	-LOG10(p)	FDR	Fisher's LSD			Short description of metabolite
					SIHUMI vs Bw	SIHUMI vs SIHUMI+Bw	Bw vs SIHUMI+Bw
Tauro conjugated bile acids	25.682	3.9662e-06	5.4016	0.00029747	SIHUMI > Bw	SIHUMI > SIHUMI+Bw	ns	Bile acids formed in the liver conjugated with taurine.
Inosine	13.902	0.00019078	3.7195	0.0065981	ns	SIHUMI > SIHUMI+Bw	Bw > SIHUMI+Bw	Nucleoside involved in purine metabolism, precursor to adenosine and guanosine.
Serine	13.116	0.00026392	3.5785	0.0065981	ns	SIHUMI > SIHUMI+Bw	Bw > SIHUMI+Bw	Amino acid involved in various metabolic processes, including protein synthesis and neurotransmitter function.
Aspartate	10.9	0.00070295	3.1531	0.0088394	ns	SIHUMI > SIHUMI+Bw	Bw > SIHUMI+Bw	Amino acid involved in protein synthesis, urea production, and energy metabolism.
Uridine monophosphate	10.887	0.00070715	3.1505	0.0088394	ns	ns	Bw > SIHUMI+Bw	Intermediate in nucleotide biosynthesis, precursor to various nucleotides.
Uridine	11.402	0.00055789	3.2535	0.0088394	SIHUMI > Bw	SIHUMI > SIHUMI+Bw	Bw > SIHUMI+Bw	Nucleoside essential for RNA synthesis.
2-Oxoisocaproate	8.4336	0.0023908	2.6215	0.020328	Bw > SIHUMI	ns	Bw > SIHUMI+Bw	Intermediate in the breakdown of branched-chain amino acids, precursor to acetyl-CoA.
Alanine	8.6582	0.0021242	2.6728	0.020328	ns	SIHUMI > SIHUMI+Bw	Bw > SIHUMI+Bw	Amino acid involved in protein synthesis and energy metabolism.
Hypoxanthine	8.3956	0.0024394	2.6127	0.020328	ns	SIHUMI > SIHUMI+Bw	Bw > SIHUMI+Bw	Intermediate in purine metabolism, precursor to nucleotides such as inosine monophosphate.
4-Hydroxyphenylacetate	7.9985	0.0030191	2.5201	0.022643	ns	SIHUMI > SIHUMI+Bw	Bw > SIHUMI+Bw	Metabolite of phenylalanine, involved in microbial metabolism in the gut.
Isovalerate	7.2051	0.0046914	2.3287	0.029003	ns	SIHUMI > SIHUMI+Bw	Bw > SIHUMI+Bw	Short-chain fatty acid produced by microbial fermentation in the gut.
Citrulline	7.362	0.0042927	2.3673	0.029003	ns	SIHUMI+Bw > SIHUMI	SIHUMI+Bw > Bw	Non-proteinogenic amino acid involved in the urea cycle and nitric oxide synthesis.
Propionate	7.084	0.0050272	2.2987	0.029003	ns	ns	Bw > SIHUMI+Bw	Short-chain fatty acid involved in energy metabolism and gut health.
Arginine	6.7727	0.0060188	2.2205	0.032243	ns	SIHUMI > SIHUMI+Bw	Bw > SIHUMI+Bw	Essential amino acid involved in protein synthesis, immune function, and nitric oxide production.
Propylene glycol	6.4592	0.0072404	2.1402	0.036202	ns	ns	Bw > SIHUMI+Bw	Chemical compound used as a solvent and humectant in various applications.
4-Aminobutyrate	6.2341	0.0082864	2.0816	0.038842	ns	SIHUMI+Bw > SIHUMI	SIHUMI+Bw > Bw	Gamma-aminobutyric acid (GABA), a neurotransmitter with inhibitory effects in the central nervous system.
3-Methyl-2-oxovalerate	6.0379	0.0093358	2.0298	0.038924	ns	ns	Bw > SIHUMI+Bw	Intermediate in the degradation of branched-chain amino acids.
Threonine	6.0368	0.0093418	2.0296	0.038924	SIHUMI > Bw	SIHUMI > SIHUMI+Bw	ns	Essential amino acid involved in protein synthesis and various metabolic pathways.
Leucine	5.7662	0.011039	1.9571	0.04165	ns	SIHUMI > SIHUMI+Bw	Bw > SIHUMI+Bw	Essential amino acid involved in protein synthesis and regulation of blood sugar levels.
Uracil	5.5978	0.012266	1.9113	0.04165	ns	SIHUMI > SIHUMI+Bw	Bw > SIHUMI+Bw	Nucleobase found in RNA, involved in nucleic acid synthesis.
p-Cresol	5.5727	0.012461	1.9044	0.04165	ns	SIHUMI > SIHUMI+Bw	Bw > SIHUMI+Bw	Metabolite produced by microbial fermentation in the gut, potentially toxic at high levels.
Orotate	5.5088	0.012974	1.8869	0.04165	ns	SIHUMI > SIHUMI+Bw	Bw > SIHUMI+Bw	Intermediate in pyrimidine biosynthesis, precursor to uridine monophosphate.
Acetate	5.4664	0.013328	1.8752	0.04165	ns	ns	Bw > SIHUMI+Bw	Short-chain fatty acid produced by microbial fermentation in the gut.
Valerate	5.6545	0.011837	1.9268	0.04165	SIHUMI > Bw	SIHUMI > SIHUMI+Bw	ns	Short-chain fatty acid produced by microbial fermentation in the gut.
Raffinose	5.3714	0.014159	1.849	0.042477	ns	SIHUMI+Bw > SIHUMI	SIHUMI+Bw > Bw	Tri-saccharide found in various plants, including beans and cruciferous vegetables.
Galactose	5.2122	0.015684	1.8046	0.045241	SIHUMI > Bw	SIHUMI > SIHUMI+Bw	ns	Simple sugar found in milk and dairy products, used in energy metabolism.
O-Phosphocholine	4.888	0.019381	1.7126	0.053836	ns	ns	Bw > SIHUMI+Bw	Intermediate in phospholipid metabolism, precursor to choline and other compounds.
Fumarate	4.3565	0.027712	1.5573	0.07423	ns	SIHUMI > SIHUMI+Bw	Bw > SIHUMI+Bw	Intermediate in the citric acid cycle, involved in energy metabolism.
Glutamate	4.2418	0.029988	1.523	0.077556	ns	SIHUMI > SIHUMI+Bw	Bw > SIHUMI+Bw	Amino acid with various functions, including neurotransmission and protein synthesis.
Lysine	4.0956	0.033196	1.4789	0.082989	ns	ns	Bw > SIHUMI+Bw	Essential amino acid involved in protein synthesis and immune function.
Methylsuccinate	3.8684	0.038961	1.4094	0.094261	ns	ns	Bw > SIHUMI+Bw	Intermediate in the citric acid cycle, produced during anaerobic metabolism.
Valine	3.7327	0.042924	1.3673	0.1006	ns	SIHUMI > SIHUMI+Bw	Bw > SIHUMI+Bw	Essential amino acid involved in protein synthesis and energy metabolism.
Adenosine monophosphate	3.6208	0.046532	1.3323	0.10575	Bw > SIHUMI	ns	Bw > SIHUMI+Bw	Nucleotide involved in cellular energy transfer and nucleic acid synthesis.
Phenylalanine	3.3321	0.057484	1.2405	0.12503	ns	SIHUMI > SIHUMI+Bw	Bw > SIHUMI+Bw	Essential amino acid, precursor to various neurotransmitters and hormones.
Sucrose	3.312	0.058347	1.234	0.12503	ns	ns	Bw > SIHUMI+Bw	Disaccharide composed of glucose and fructose.
Creatinine	3.166	0.06506	1.1867	0.13554	ns	ns	Bw > SIHUMI+Bw	Metabolite derived from creatine phosphate, excreted by the kidneys.
Lactate	3.099	0.068419	1.1648	0.13586	Bw > SIHUMI	ns	ns	Product of anaerobic metabolism, important in energy production.
Proline	3.0566	0.070645	1.1509	0.13586	ns	SIHUMI > SIHUMI+Bw	ns	Amino acid involved in protein synthesis and structure, particularly in collagen.
Glycine	3.0868	0.06905	1.1608	0.13586	ns	ns	Bw > SIHUMI+Bw	Simple amino acid involved in protein synthesis and various metabolic pathways.
Methionine	2.7887	0.08671	1.0619	0.15495	ns	SIHUMI > SIHUMI+Bw	ns	Essential amino acid involved in protein synthesis and various metabolic pathways.
Nicotinate	2.8271	0.084175	1.0748	0.15495	ns	ns	Bw > SIHUMI+Bw	Form of vitamin B3 (niacin), involved in energy metabolism and DNA repair.
Ethanol	2.7574	0.088835	1.0514	0.15495	ns	ns	SIHUMI+Bw > Bw	Simple alcohol produced by fermentation of sugars, commonly found in alcoholic beverages.
Lactose	2.765	0.088314	1.054	0.15495	SIHUMI > Bw	ns	ns	Disaccharide composed of glucose and galactose, found in milk.
Urocanate	2.6469	0.096816	1.0141	0.16136	ns	SIHUMI > SIHUMI+Bw	ns	Intermediate in the catabolism of histidine, further metabolized in the urea cycle.
Benzoate	2.6479	0.096738	1.0144	0.16136	ns	ns	ns	Compound used as a preservative in food and beverages.
Formate	2.5051	0.10825	0.96559	0.17649	ns	ns	Bw > SIHUMI+Bw	Simplest carboxylic acid, produced during various metabolic processes.
Choline	2.3471	0.12276	0.91094	0.19589	ns	ns	ns	Essential nutrient, precursor to neurotransmitter acetylcholine and phospholipids.
1-Methylnicotinamide	2.3056	0.12692	0.89647	0.19831	ns	ns	ns	Metabolite of nicotinamide, involved in NAD+ biosynthesis and cellular signaling.

## Sheet: SupplementaryTable3
Supplementary Table 3. H2S quantified from animals used in this study. Mean ± standard deviation
Group	Organ	Number of mice	H2S (µmol/mg tissue)
SIHUMI	Small intestine	10	77±41
	Colon		189±164
	Liver		58±36
SIHUMI+Bw	Small intestine	5*	142±95
	Colon		347±97
	Liver		131±42
Bw	Small intestine	9	2086±834
	Colon		2346±1282
	Liver		634±566
*One animal was excluded from the quantification
